# Supplementary material for: A comprehensive estimation of country-level basic reproduction numbers R0 for COVID-19: Regime regression can automatically estimate the end of the exponential phase in epidemic data
Source: PLoS One. 2021 Jul 13;16(7):e0254145. doi: 10.1371/journal.pone.0254145 (PMC8277067; doi:10.1371/journal.pone.0254145)
Supplement: S1 File — (XLSX) [file pone.0254145.s003.xlsx]

## Sheet: slope.csv
mu	5.4
sigma	1.72
kappa	0.101454
code	country	slope	error	number_of_points	start_date	end_date	doubling_time_(days)	start_after_new_year_(days)	r_0	r_0 error
ESP	Spain	0.33866	0.013927	12	2020-03-05	2020-03-16	2.04673	65	5.35244	0.339538
IRN	Iran	0.338426	0.0186546	10	2020-02-27	2020-03-07	2.04815	58	5.34674	0.454361
USA	United States	0.295904	0.0055655	21	2020-03-06	2020-03-26	2.34247	66	4.3967	0.113704
TUR	Turkey	0.294286	0.0132684	12	2020-03-20	2020-03-31	2.35535	80	4.36376	0.26925
DEU	Germany	0.23954	0.00665448	19	2020-03-04	2020-03-22	2.89366	64	3.37166	0.107102
KOR	South Korea	0.216182	0.0137836	12	2020-02-22	2020-03-04	3.20631	53	3.014	0.20058
ISR	Israel	0.210749	0.0111862	14	2020-03-18	2020-03-31	3.28897	78	2.93586	0.158986
PRT	Portugal	0.210581	0.010245	15	2020-03-15	2020-03-29	3.29159	75	2.93348	0.145503
ITA	Italy	0.202664	0.00577078	21	2020-02-24	2020-03-15	3.42018	55	2.82295	0.0791783
CHE	Switzerland	0.202301	0.00698813	19	2020-03-07	2020-03-25	3.42632	67	2.81798	0.0957292
BLR	Belarus	0.199604	0.0116417	14	2020-04-02	2020-04-15	3.47261	93	2.78125	0.157609
CAN	Canada	0.19651	0.00896393	16	2020-03-16	2020-03-31	3.52729	76	2.73964	0.119724
AUS	Australia	0.193604	0.0116484	14	2020-03-15	2020-03-28	3.58023	75	2.70108	0.153609
FRA	France	0.192858	0.00620615	20	2020-03-04	2020-03-23	3.59408	64	2.69126	0.0815737
AUT	Austria	0.189401	0.00836057	17	2020-03-11	2020-03-27	3.65968	71	2.64616	0.108235
GBR	United Kingdom	0.184385	0.00474393	24	2020-03-05	2020-03-28	3.75924	65	2.58193	0.0600736
PHL	Philippines	0.177277	0.0116694	14	2020-03-22	2020-04-04	3.90997	82	2.49332	0.143207
BEL	Belgium	0.168822	0.00492239	24	2020-03-09	2020-04-01	4.10579	69	2.39148	0.0581861
CHN	China	0.155161	0.0116215	12	2020-01-28	2020-02-08	4.46728	28	2.23481	0.12926
NLD	Netherlands	0.155045	0.00522969	23	2020-03-08	2020-03-30	4.47062	68	2.23352	0.058137
OWID_WRL	World	0.154467	0.0116139	12	2020-01-28	2020-02-08	4.48735	28	2.2271	0.128775
RUS	Russia	0.154026	0.00301053	32	2020-03-21	2020-04-21	4.5002	81	2.22222	0.033315
IND	India	0.15103	0.00530596	23	2020-03-21	2020-04-12	4.58947	81	2.18928	0.0579342
ROU	Romania	0.148521	0.00816734	18	2020-03-18	2020-04-04	4.667	78	2.16204	0.088179
ARE	United Arab Emirates	0.142361	0.00687416	20	2020-03-25	2020-04-13	4.86894	85	2.09645	0.0721907
BRA	Brazil	0.132072	0.00442592	25	2020-03-17	2020-04-10	5.24825	77	1.99086	0.044371
NPL	Nepal	0.125215	0.00569391	23	2020-05-18	2020-06-09	5.53566	139	1.92318	0.0553361
PER	Peru	0.114282	0.00703522	20	2020-03-19	2020-04-07	6.06523	79	1.81952	0.0650512
CZE	Czech Republic	0.113826	0.00736212	19	2020-03-15	2020-04-02	6.08953	75	1.81531	0.0679322
SSD	South Sudan	0.108126	0.0289146	8	2020-05-21	2020-05-28	6.41055	142	1.76339	0.259937
POL	Poland	0.107467	0.00513855	24	2020-03-17	2020-04-09	6.44986	77	1.75748	0.0460553
QAT	Qatar	0.0959307	0.0364788	7	2020-03-11	2020-03-17	7.2255	71	1.65677	0.310065
SRB	Serbia	0.0900101	0.00427712	27	2020-03-24	2020-04-19	7.70077	84	1.60713	0.0353746
MMR	Myanmar	0.0856511	0.0022407	40	2020-08-29	2020-10-07	8.09268	242	1.57144	0.0181618
JOR	Jordan	0.0855854	0.00159766	51	2020-08-22	2020-10-11	8.0989	235	1.57091	0.0129458
SAU	Saudi Arabia	0.0850902	0.00193475	44	2020-03-19	2020-05-01	8.14603	79	1.5669	0.0156413
DJI	Djibouti	0.0820869	0.024192	9	2020-04-14	2020-04-22	8.44407	105	1.54279	0.192871
IRL	Ireland	0.0820551	0.00309184	32	2020-03-18	2020-04-18	8.44734	78	1.54253	0.0246461
MEX	Mexico	0.0808596	0.00188334	45	2020-03-21	2020-05-04	8.57223	81	1.53303	0.0149296
GHA	Ghana	0.0700693	0.00319379	33	2020-04-12	2020-05-14	9.89231	103	1.44961	0.0240764
ECU	Ecuador	0.0692999	0.00383143	28	2020-03-20	2020-04-16	10.0021	80	1.44382	0.0287795
SWE	Sweden	0.0690519	0.00256826	37	2020-03-08	2020-04-13	10.0381	68	1.44196	0.019269
KWT	Kuwait	0.066279	0.00156225	51	2020-04-04	2020-05-24	10.458	95	1.42129	0.0115701
BOL	Bolivia	0.0631548	0.0017419	49	2020-04-18	2020-06-05	10.9754	109	1.39832	0.0127131
SDN	Sudan	0.0630191	0.00377681	30	2020-04-28	2020-05-27	10.999	119	1.39733	0.0275471
ZWE	Zimbabwe	0.0611097	0.00361939	31	2020-07-08	2020-08-07	11.3427	190	1.38346	0.0261634
CRI	Costa Rica	0.0608762	0.00153551	53	2020-06-06	2020-07-28	11.3862	158	1.38177	0.0110876
GEO	Georgia	0.0588817	0.000960658	68	2020-09-08	2020-11-14	11.7719	252	1.36744	0.00687199
AFG	Afghanistan	0.0583056	0.00121946	62	2020-04-05	2020-06-05	11.8882	96	1.36332	0.00869971
MRT	Mauritania	0.0557753	0.00359912	31	2020-05-29	2020-06-28	12.4275	150	1.34538	0.0253725
GMB	Gambia	0.0556348	0.00440286	28	2020-07-27	2020-08-23	12.4589	209	1.34439	0.0310181
CHL	Chile	0.0551757	0.000696176	82	2020-03-18	2020-06-07	12.5625	78	1.34116	0.00489395
NOR	Norway	0.0535495	0.00498082	24	2020-03-10	2020-04-02	12.944	70	1.32977	0.0347467
GTM	Guatemala	0.0532161	0.00128001	61	2020-04-24	2020-06-23	13.0251	115	1.32745	0.00891546
BGD	Bangladesh	0.0529022	0.00102789	64	2020-04-09	2020-06-11	13.1024	100	1.32526	0.00714882
MAR	Morocco	0.0524797	0.00342505	32	2020-03-26	2020-04-26	13.2079	86	1.32233	0.0237733
FIN	Finland	0.0523313	0.00368948	31	2020-03-14	2020-04-13	13.2454	74	1.3213	0.0255908
THA	Thailand	0.0504704	0.00895579	17	2020-03-20	2020-04-05	13.7337	80	1.30845	0.0615755
DNK	Denmark	0.0503163	0.00296467	34	2020-03-10	2020-04-12	13.7758	70	1.30739	0.0203688
ZAF	South Africa	0.0499178	0.000397438	120	2020-03-22	2020-07-19	13.8858	82	1.30465	0.00272546
PAK	Pakistan	0.0464925	0.000546501	97	2020-03-16	2020-06-20	14.9088	76	1.28135	0.00368748
EGY	Egypt	0.0451354	0.000687704	88	2020-03-22	2020-06-17	15.3571	82	1.27222	0.00461053
OMN	Oman	0.0447252	0.000777161	81	2020-04-09	2020-06-28	15.4979	100	1.26948	0.00520016
SGP	Singapore	0.0441664	0.00798226	19	2020-03-21	2020-04-08	15.694	81	1.26574	0.0532699
LBY	Libya	0.0421273	0.000954525	72	2020-07-04	2020-09-13	16.4536	186	1.2522	0.00630878
ETH	Ethiopia	0.041988	0.00308698	34	2020-05-24	2020-06-26	16.5082	145	1.25128	0.0203894
GRC	Greece	0.0408546	0.00554626	24	2020-03-15	2020-04-07	16.9662	75	1.24381	0.0364364
ARM	Armenia	0.0407558	0.000781524	84	2020-03-28	2020-06-19	17.0073	88	1.24316	0.00513186
HND	Honduras	0.0406207	0.000928568	72	2020-04-29	2020-07-09	17.0639	120	1.24228	0.00609351
EST	Estonia	0.0393188	0.00581249	24	2020-03-17	2020-04-09	17.6289	77	1.23376	0.037908
ARG	Argentina	0.0387757	0.000345843	134	2020-03-22	2020-08-02	17.8758	82	1.23022	0.00224971
COL	Colombia	0.038597	0.000323091	137	2020-03-23	2020-08-06	17.9586	83	1.22906	0.00209993
MNE	Montenegro	0.0379453	0.0143825	13	2020-07-03	2020-07-15	18.267	185	1.22483	0.0931899
URY	Uruguay	0.0371109	0.00168005	52	2020-10-17	2020-12-07	18.6777	291	1.21944	0.0108426
KEN	Kenya	0.0364801	0.000667441	93	2020-05-07	2020-08-07	19.0007	128	1.21537	0.00429459
BHR	Bahrain	0.0348096	0.000869487	77	2020-04-04	2020-06-19	19.9125	95	1.20467	0.00555033
VEN	Venezuela	0.0340377	0.000609977	95	2020-05-19	2020-08-21	20.3641	140	1.19975	0.00387948
KAZ	Kazakhstan	0.0332808	0.00105263	69	2020-03-29	2020-06-05	20.8272	89	1.19494	0.00667067
NAM	Namibia	0.0317173	0.00117603	65	2020-07-03	2020-09-05	21.8539	185	1.18507	0.00739733
AZE	Azerbaijan	0.0309146	0.000551764	105	2020-03-31	2020-07-13	22.4214	91	1.18003	0.00345738
HUN	Hungary	0.0295282	0.00329065	34	2020-03-27	2020-04-29	23.4741	87	1.17137	0.0204834
NGA	Nigeria	0.0284342	0.00083684	77	2020-04-18	2020-07-03	24.3772	109	1.16458	0.00518194
COG	Congo	0.027559	0.00577101	23	2020-07-01	2020-07-23	25.1514	183	1.15917	0.0355865
SLV	El Salvador	0.0252597	0.000574263	102	2020-05-04	2020-08-13	27.4408	125	1.14507	0.00350242
MOZ	Mozambique	0.0251541	0.000835131	83	2020-07-14	2020-10-04	27.556	196	1.14443	0.00509088
SUR	Suriname	0.0247656	0.00256592	40	2020-07-16	2020-08-24	27.9883	198	1.14206	0.0156125
SVK	Slovakia	0.0240235	0.00821214	19	2020-04-07	2020-04-25	28.8529	98	1.13755	0.0497902
CAF	Central African Republic	0.0239263	0.00221884	44	2020-05-19	2020-07-01	28.9701	140	1.13697	0.0134466
COD	Democratic Republic of Congo	0.023796	0.00132439	61	2020-05-01	2020-06-30	29.1287	122	1.13618	0.00802103
PAN	Panama	0.0232848	0.000409342	122	2020-03-22	2020-07-21	29.7682	82	1.13308	0.00247307
IDN	Indonesia	0.0232299	0.000362468	130	2020-03-19	2020-07-26	29.8386	79	1.13275	0.0021893
TTO	Trinidad and Tobago	0.023086	0.00239867	41	2020-08-15	2020-09-24	30.0246	228	1.13188	0.014478
JAM	Jamaica	0.0218782	0.00203014	45	2020-08-20	2020-10-03	31.6821	233	1.12461	0.0121828
JPN	Japan	0.0210821	0.00697861	21	2020-03-07	2020-03-27	32.8785	67	1.11985	0.041719
DOM	Dominican Republic	0.0203065	0.000338354	137	2020-03-23	2020-08-06	34.1343	83	1.11522	0.00201521
DZA	Algeria	0.0199439	0.00113185	66	2020-03-25	2020-05-29	34.7548	85	1.11306	0.00672948
AGO	Angola	0.0198981	0.00049559	117	2020-07-16	2020-11-09	34.8348	198	1.11279	0.00294591
MDG	Madagascar	0.0198187	0.00236694	43	2020-05-22	2020-07-03	34.9744	143	1.11232	0.0140643
ISL	Iceland	0.0193022	0.00683175	21	2020-03-19	2020-04-08	35.9103	79	1.10925	0.0404937
UKR	Ukraine	0.017778	0.000120271	256	2020-03-27	2020-12-07	38.989	87	1.10025	0.000707679
MYS	Malaysia	0.015661	0.00304214	34	2020-03-15	2020-04-17	44.2594	75	1.08786	0.0177188
PSE	Palestine	0.0155414	0.000574163	97	2020-06-20	2020-09-24	44.6	172	1.08716	0.00334226
MLT	Malta	0.0148624	0.000495859	119	2020-08-09	2020-12-05	46.6376	222	1.08321	0.00287703
NZL	New Zealand	0.0147478	0.00935966	17	2020-03-26	2020-04-11	47	86	1.08255	0.0542758
IRQ	Iraq	0.0132984	0.00148944	57	2020-03-27	2020-05-22	52.1226	87	1.07417	0.00857706
KGZ	Kyrgyzstan	0.0115097	0.00138831	64	2020-04-12	2020-06-14	60.2229	103	1.06392	0.00792607
ALB	Albania	0.0107557	0.000336357	147	2020-06-13	2020-11-06	64.4446	165	1.05962	0.00191334
RWA	Rwanda	0.0105426	0.00325649	36	2020-06-29	2020-08-03	65.7473	181	1.05841	0.0185053
MDA	Moldova	0.010488	0.000137122	252	2020-03-31	2020-12-07	66.0895	91	1.0581	0.000779002
BHS	Bahamas	0.010134	0.000720305	93	2020-07-28	2020-10-28	68.3982	210	1.05609	0.00408513
CIV	Cote d'Ivoire	0.00938367	0.00159327	56	2020-04-09	2020-06-03	73.8674	100	1.05184	0.0090034
BLZ	Belize	0.00858835	0.000566173	111	2020-08-14	2020-12-02	80.7078	227	1.04736	0.00318712
GAB	Gabon	0.00851786	0.00149286	56	2020-05-07	2020-07-01	81.3757	128	1.04696	0.0084008
CPV	Cape Verde	0.0073426	0.000391003	141	2020-06-27	2020-11-14	94.4008	179	1.04036	0.00218784
SMR	San Marino	0.00488617	0.00575298	25	2020-11-13	2020-12-07	141.859	318	1.0267	0.0318104
SEN	Senegal	0.00419978	0.000435572	126	2020-04-25	2020-08-28	165.044	116	1.02291	0.00240046
SOM	Somalia	0.00293621	0.00154605	58	2020-04-21	2020-06-17	236.069	112	1.01597	0.00846837
SYR	Syria	0.00176319	0.000457254	125	2020-08-05	2020-12-07	393.121	218	1.00956	0.00249038
GUY	Guyana	-0.00166167	0.000589697	110	2020-08-20	2020-12-07	-417.139	233	0.991063	0.00315878
GIN	Guinea	-0.00310406	0.000183365	237	2020-04-14	2020-12-06	-223.303	105	0.983364	0.000975357
HRV	Croatia	-0.00504831	0.0044641	28	2020-03-23	2020-04-19	-137.303	83	0.973071	0.023522
TJK	Tajikistan	-0.00522219	0.000202349	218	2020-05-04	2020-12-07	-132.731	125	0.972155	0.00106531
BGR	Bulgaria	-0.0097916	0.00265054	41	2020-04-17	2020-05-27	-70.79	108	0.948364	0.0136471
NIC	Nicaragua	-0.010346	0.000337854	168	2020-05-19	2020-11-02	-66.9966	140	0.945513	0.00173484
UZB	Uzbekistan	-0.0113905	0.00184314	50	2020-04-06	2020-05-25	-60.8531	97	0.940164	0.00941617
SLE	Sierra Leone	-0.0129008	0.000418373	175	2020-05-25	2020-11-15	-53.729	146	0.932476	0.00212166
SVN	Slovenia	-0.0140558	0.00323355	37	2020-03-16	2020-04-21	-49.314	76	0.926635	0.0163057
LTU	Lithuania	-0.0152768	0.0036508	33	2020-03-25	2020-04-26	-45.3725	85	0.920497	0.0183001
SWZ	Swaziland	-0.0156867	0.000448113	139	2020-07-06	2020-11-21	-44.1869	188	0.918444	0.00224173
MKD	Macedonia	-0.0157419	0.00169145	56	2020-04-03	2020-05-28	-44.032	94	0.918168	0.00845935
MDV	Maldives	-0.0162186	0.00119881	71	2020-04-30	2020-07-09	-42.7378	121	0.915787	0.00598156
HTI	Haiti	-0.0174472	0.000272238	197	2020-05-17	2020-11-29	-39.7283	138	0.909675	0.00135021
BIH	Bosnia and Herzegovina	-0.0178653	0.0012376	70	2020-03-30	2020-06-07	-38.7985	90	0.907603	0.0061255
LIE	Liechtenstein	-0.0215635	0.00388388	33	2020-11-05	2020-12-07	-32.1445	310	0.889464	0.0188777
BEN	Benin	-0.0240471	0.0645408	5	2020-05-10	2020-05-14	-28.8246	131	0.877466	0.309897
BFA	Burkina Faso	-0.0255857	0.00148663	66	2020-09-13	2020-11-17	-27.0912	257	0.870106	0.00708434
CUB	Cuba	-0.0259167	0.000737465	110	2020-04-07	2020-07-25	-26.7452	98	0.86853	0.00350857
UGA	Uganda	-0.0260022	0.00173851	61	2020-05-30	2020-07-29	-26.6573	151	0.868123	0.00826768
YEM	Yemen	-0.0260496	0.000885122	103	2020-06-13	2020-09-23	-26.6087	165	0.867898	0.00420831
LVA	Latvia	-0.0309562	0.00139363	84	2020-04-01	2020-06-23	-22.3912	92	0.844849	0.00646769
MLI	Mali	-0.0322091	0.00119787	80	2020-05-28	2020-08-15	-21.5202	149	0.839053	0.0055249
GNB	Guinea-Bissau	-0.0363344	0.0018061	56	2020-05-04	2020-06-28	-19.0769	125	0.820218	0.00816201
STP	Sao Tome and Principe	-0.0379048	0.0922555	4	2020-05-29	2020-06-01	-18.2865	150	0.813149	0.413685
OWID_KOS	Kosovo	-0.0382093	0.00230068	50	2020-04-13	2020-06-01	-18.1408	104	0.811784	0.010301
LKA	Sri Lanka	-0.0388445	0.00492297	28	2020-04-26	2020-05-23	-17.8442	117	0.808945	0.0219726
MWI	Malawi	-0.0436937	0.00837275	20	2020-06-01	2020-06-20	-15.8638	153	0.78756	0.0364811
TUN	Tunisia	-0.0454101	0.00295534	42	2020-03-28	2020-05-08	-15.2642	88	0.780113	0.0127673
CYP	Cyprus	-0.0457565	0.00155377	78	2020-04-02	2020-06-18	-15.1486	93	0.778618	0.00670086
LUX	Luxembourg	-0.053403	0.00104514	86	2020-03-19	2020-06-12	-12.9796	79	0.746262	0.00433866
LBN	Lebanon	-0.0546154	0.00330581	42	2020-03-26	2020-05-06	-12.6914	86	0.741244	0.0136404
ZMB	Zambia	-0.0612695	0.00677146	22	2020-05-12	2020-06-02	-11.3131	133	0.71424	0.0270239
CMR	Cameroon	-0.0644457	0.00903219	18	2020-04-02	2020-04-19	-10.7555	93	0.701665	0.0354754
LSO	Lesotho	-0.0668803	0.0230788	10	2020-07-29	2020-08-07	-10.364	211	0.692161	0.0895418
AND	Andorra	-0.0701912	0.00428635	37	2020-03-28	2020-05-03	-9.87513	88	0.679422	0.016355
NER	Niger	-0.0788323	0.00464939	31	2020-04-06	2020-05-06	-8.79268	97	0.647161	0.0169815
MNG	Mongolia	-0.0887945	0.0132111	15	2020-11-23	2020-12-07	-7.80619	328	0.61168	0.0458686
VNM	Vietnam	-0.0931253	0.00511112	35	2020-08-03	2020-09-06	-7.44317	216	0.596809	0.0173575
PRY	Paraguay	-0.10346	0.00812905	21	2020-05-08	2020-05-28	-6.69966	129	0.562625	0.0261815
BWA	Botswana	-0.175059	0.0290251	9	2020-07-27	2020-08-04	-3.95951	209	0.370177	0.0641747
GNQ	Equatorial Guinea	-0.299894	0.0437266	7	2020-04-28	2020-05-04	-2.31131	119	0.170486	0.04817

## Sheet: code2r0.csv
code	Region Name	Sub-region Name	country	slope	error	number_of_points	start_date	end_date	r0	r0_error	pf_eigenvalue	pf_eigenvalue [0]	pf_eigenvalue [0, 1]	pf_eigenvalue [0, 1, 2]	pf_eigenvalue [0, 1, 2, 3]	pf_eigenvalue [0, 1, 2, 3, 4]	pf_eigenvalue [0, 1, 2, 3, 4, 5]	pf_eigenvalue [0, 1, 2, 3, 4, 5, 6]	pf_eigenvalue [0, 1, 2, 3, 4, 5, 6, 7]
MAR	Africa	Northern Africa	Morocco	0.0524797	0.00342505	32	2020-03-26	2020-04-26	1.32233	0.0237733	18.3856	18.1837	17.4678	15.8653	9.8879	7.65836	5.92906	4.51358	3.29638
EGY	Africa	Northern Africa	Egypt	0.0451354	0.000687704	88	2020-03-22	2020-06-17	1.27222	0.00461053	22.1098	21.9294	21.4416	19.9262	9.87108	6.83491	5.22368	4.14406	2.98306
DZA	Africa	Northern Africa	Algeria	0.0199439	0.00113185	66	2020-03-25	2020-05-29	1.11306	0.00672948	20.0421	19.8623	19.4133	18.0019	10.3666	7.07576	4.92879	3.57009	2.36333
TUN	Africa	Northern Africa	Tunisia	-0.0454101	0.00295534	42	2020-03-28	2020-05-08	0.780113	0.0127673	18.9758	18.8403	18.4159	17.2226	10.3443	7.66712	5.7449	4.33073	3.08212
GHA	Africa	Sub-Saharan Africa	Ghana	0.0700693	0.00319379	33	2020-04-12	2020-05-14	1.44961	0.0240764	20.9727	20.141	18.1881	15.6529	11.5655	9.8076	8.05418	6.45955	4.81656
ZWE	Africa	Sub-Saharan Africa	Zimbabwe	0.0611097	0.00361939	31	2020-07-08	2020-08-07	1.38346	0.0261634	25.4425	24.9866	23.0863	19.927	10.8767	8.18186	6.43439	5.08218	3.8304
MRT	Africa	Sub-Saharan Africa	Mauritania	0.0557753	0.00359912	31	2020-05-29	2020-06-28	1.34538	0.0253725	24.3992	23.8652	20.7727	14.4638	8.06677	6.17298	4.85183	3.77407	2.81174
ZAF	Africa	Sub-Saharan Africa	South Africa	0.0499178	0.000397438	120	2020-03-22	2020-07-19	1.30465	0.00272546	18.5839	18.159	16.421	14.1315	11.3126	8.79483	6.66555	5.03545	3.48381
ETH	Africa	Sub-Saharan Africa	Ethiopia	0.041988	0.00308698	34	2020-05-24	2020-06-26	1.25128	0.0203894	28.0314	27.4517	23.9986	16.5346	11.8516	9.74675	7.83667	6.16547	4.61534
KEN	Africa	Sub-Saharan Africa	Kenya	0.0364801	0.000667441	93	2020-05-07	2020-08-07	1.21537	0.00429459	23.1567	22.4046	20.1257	16.878	10.4792	8.45079	6.66529	5.12897	3.60785
NAM	Africa	Sub-Saharan Africa	Namibia	0.0317173	0.00117603	65	2020-07-03	2020-09-05	1.18507	0.00739733	22.4346	22.0067	20.3166	16.7862	12.387	9.95127	7.86074	6.06594	4.30236
NGA	Africa	Sub-Saharan Africa	Nigeria	0.0284342	0.00083684	77	2020-04-18	2020-07-03	1.16458	0.00518194	24.1516	23.4135	20.2518	18.1784	9.78379	7.55928	5.93809	4.72788	3.63914
COG	Africa	Sub-Saharan Africa	Congo	0.027559	0.00577101	23	2020-07-01	2020-07-23	1.15917	0.0355865	20.8818	19.9774	16.7146	13.5642	10.4128	8.55843	6.73461	5.03502	3.51527
MOZ	Africa	Sub-Saharan Africa	Mozambique	0.0251541	0.000835131	83	2020-07-14	2020-10-04	1.14443	0.00509088	27.3977	26.3973	16.6301	12.5567	10.1859	8.58083	7.06319	5.68296	4.36371
RWA	Africa	Sub-Saharan Africa	Rwanda	0.0105426	0.00325649	36	2020-06-29	2020-08-03	1.05841	0.0185053	22.4178	21.2626	18.4844	15.4841	12.0845	9.80553	7.62216	6.0026	4.60257
CPV	Africa	Sub-Saharan Africa	Cabo Verde	0.0073426	0.000391003	141	2020-06-27	2020-11-14	1.04036	0.00218784	26.4833	26.2035	25.307	22.7505	8.00089	5.76484	4.64748	3.69953	2.71306
SEN	Africa	Sub-Saharan Africa	Senegal	0.00419978	0.000435572	126	2020-04-25	2020-08-28	1.02291	0.00240046	25.0066	24.4741	22.6685	16.2073	9.0581	6.9998	5.52589	4.34583	3.15488
GIN	Africa	Sub-Saharan Africa	Guinea	-0.00310406	0.000183365	237	2020-04-14	2020-12-06	0.983364	0.000975357	25.3589	24.824	23.3552	19.5798	10.3825	8.39943	7.06272	5.81574	4.44769
SLE	Africa	Sub-Saharan Africa	Sierra Leone	-0.0129008	0.000418373	175	2020-05-25	2020-11-15	0.932476	0.00212166	25.0353	24.2777	18.0566	15.2398	10.5511	9.31954	7.57363	6.07548	4.52745
BEN	Africa	Sub-Saharan Africa	Benin	-0.0240471	0.0645408	5	2020-05-10	2020-05-14	0.877466	0.309897	26.8746	25.9826	20.8505	16.4534	11.0544	9.58401	8.0677	6.55953	4.97384
BFA	Africa	Sub-Saharan Africa	Burkina Faso	-0.0255857	0.00148663	66	2020-09-13	2020-11-17	0.870106	0.00708434	26.3845	25.4844	21.1017	15.9562	9.61722	7.90558	6.42744	5.15423	3.92488
UGA	Africa	Sub-Saharan Africa	Uganda	-0.0260022	0.00173851	61	2020-05-30	2020-07-29	0.868123	0.00826768	29.1789	27.8759	19.7167	15.9937	11.4211	9.62758	7.95933	6.45888	4.90663
STP	Africa	Sub-Saharan Africa	Sao Tome and Principe	-0.0379048	0.0922555	4	2020-05-29	2020-06-01	0.813149	0.413685	21.8179	21.0305	19.3671	17.3173	7.83536	4.12536	2.69967	2.02499	1.50771
ZMB	Africa	Sub-Saharan Africa	Zambia	-0.0612695	0.00677146	22	2020-05-12	2020-06-02	0.71424	0.0270239	26.1846	25.3494	21.3424	16.6664	11.0855	9.02799	7.38491	5.96587	4.53692
CMR	Africa	Sub-Saharan Africa	Cameroon	-0.0644457	0.00903219	18	2020-04-02	2020-04-19	0.701665	0.0354754	25.032	24.1477	20.9507	16.594	11.5128	9.60433	7.85946	6.32227	4.83436
LSO	Africa	Sub-Saharan Africa	Lesotho	-0.0668803	0.0230788	10	2020-07-29	2020-08-07	0.692161	0.0895418	23.0659	22.813	21.4037	18.5825	11.5494	8.67961	6.80704	5.42978	4.12936
NER	Africa	Sub-Saharan Africa	Niger	-0.0788323	0.00464939	31	2020-04-06	2020-05-06	0.647161	0.0169815	31.7606	30.8776	24.467	12.3767	7.79215	6.51434	5.408	4.31145	3.21992
BWA	Africa	Sub-Saharan Africa	Botswana	-0.175059	0.0290251	9	2020-07-27	2020-08-04	0.370177	0.0641747	21.8907	21.5362	20.2732	16.2765	11.5381	8.5458	6.31006	4.55312	3.12959
BRA	Americas	Latin America and the Caribbean	Brazil	0.132072	0.00442592	25	2020-03-17	2020-04-10	1.99086	0.044371	19.4991	19.358	18.7931	17.1288	11.8496	9.88265	7.89507	6.07833	4.35884
PER	Americas	Latin America and the Caribbean	Peru	0.114282	0.00703522	20	2020-03-19	2020-04-07	1.81952	0.0650512	19.1782	18.8363	18.0426	16.272	12.033	10.1996	8.38528	6.66112	4.92985
MEX	Americas	Latin America and the Caribbean	Mexico	0.0808596	0.00188334	45	2020-03-21	2020-05-04	1.53303	0.0149296	18.4923	18.1063	17.1805	15.3344	10.4952	8.66001	7.08567	5.54449	3.91568
ECU	Americas	Latin America and the Caribbean	Ecuador	0.0692999	0.00383143	28	2020-03-20	2020-04-16	1.44382	0.0287795	19.4633	19.1427	17.7248	15.2867	10.4881	8.77978	7.20162	5.71955	4.23564
BOL	Americas	Latin America and the Caribbean	Bolivia (Plurinational State of)	0.0631548	0.0017419	49	2020-04-18	2020-06-05	1.39832	0.0127131	20.6603	20.2595	19.093	16.6643	11.1987	9.43807	7.79309	6.27101	4.79041
CRI	Americas	Latin America and the Caribbean	Costa Rica	0.0608762	0.00153551	53	2020-06-06	2020-07-28	1.38177	0.0110876	18.7033	18.5506	17.992	16.5551	11.7497	9.62734	7.60303	5.90572	4.38348
CHL	Americas	Latin America and the Caribbean	Chile	0.0551757	0.000696176	82	2020-03-18	2020-06-07	1.34116	0.00489395	16.2043	15.9631	15.5176	14.5088	11.5186	9.93846	8.29468	6.84737	5.32287
GTM	Americas	Latin America and the Caribbean	Guatemala	0.0532161	0.00128001	61	2020-04-24	2020-06-23	1.32745	0.00891546	24.9629	24.4645	21.9581	16.8591	8.97863	6.8187	5.35114	4.11195	3.02521
HND	Americas	Latin America and the Caribbean	Honduras	0.0406207	0.000928568	72	2020-04-29	2020-07-09	1.24228	0.00609351	22.4696	21.969	20.4571	17.3054	9.91765	7.8892	6.25259	4.83862	3.53339
ARG	Americas	Latin America and the Caribbean	Argentina	0.0387757	0.000345843	134	2020-03-22	2020-08-02	1.23022	0.00224971	16.2799	15.9398	15.3366	14.1366	11.0309	9.48481	7.84725	6.16915	4.52367
COL	Americas	Latin America and the Caribbean	Colombia	0.038597	0.000323091	137	2020-03-23	2020-08-06	1.22906	0.00209993	18.6959	18.4371	17.844	16.3866	11.3857	9.48488	7.72988	6.12752	4.56407
URY	Americas	Latin America and the Caribbean	Uruguay	0.0371109	0.00168005	52	2020-10-17	2020-12-07	1.21944	0.0108426	16.078	15.8471	15.3041	14.1809	11.5142	10.1867	8.6621	7.0341	5.3089
VEN	Americas	Latin America and the Caribbean	Venezuela (Bolivarian Republic of)	0.0340377	0.000609977	95	2020-05-19	2020-08-21	1.19975	0.00387948	16.9614	16.4773	15.5163	13.9628	11.356	9.54837	7.71923	6.02417	4.36543
SLV	Americas	Latin America and the Caribbean	El Salvador	0.0252597	0.000574263	102	2020-05-04	2020-08-13	1.14507	0.00350242	21.6056	21.3986	20.7642	18.0297	10.329	8.37517	6.84373	5.41261	3.96273
SUR	Americas	Latin America and the Caribbean	Suriname	0.0247656	0.00256592	40	2020-07-16	2020-08-24	1.14206	0.0156125	16.3992	15.8713	14.7103	13.1467	10.8105	9.19738	7.44366	5.75866	4.1534
PAN	Americas	Latin America and the Caribbean	Panama	0.0232848	0.000409342	122	2020-03-22	2020-07-21	1.13308	0.00247307	17.2467	16.835	15.9104	14.2826	10.7298	9.07833	7.43219	5.87592	4.16391
JAM	Americas	Latin America and the Caribbean	Jamaica	0.0218782	0.00203014	45	2020-08-20	2020-10-03	1.12461	0.0121828	19.5888	19.4427	18.8542	16.8691	10.605	8.44625	7.03892	5.52079	4.34672
DOM	Americas	Latin America and the Caribbean	Dominican Republic	0.0203065	0.000338354	137	2020-03-23	2020-08-06	1.11522	0.00201521	18.8567	18.4862	17.5029	15.6987	11.0905	9.05374	7.21804	5.58087	4.01943
BHS	Americas	Latin America and the Caribbean	Bahamas	0.010134	0.000720305	93	2020-07-28	2020-10-28	1.05609	0.00408513	20.4057	20.2933	19.9122	18.7946	10.9237	9.51431	8.20042	6.88622	5.35499
BLZ	Americas	Latin America and the Caribbean	Belize	0.00858835	0.000566173	111	2020-08-14	2020-12-02	1.04736	0.00318712	24.2745	23.8817	21.9435	17.69	9.96521	8.38933	6.85284	5.37388	3.83738
GUY	Americas	Latin America and the Caribbean	Guyana	-0.00166167	0.000589697	110	2020-08-20	2020-12-07	0.991063	0.00315878	21.7361	21.6255	21.3959	20.2021	9.27783	7.4892	6.25527	5.00885	3.70182
NIC	Americas	Latin America and the Caribbean	Nicaragua	-0.010346	0.000337854	168	2020-05-19	2020-11-02	0.945513	0.00173484	22.8238	22.483	20.8506	17.9285	10.5232	8.07564	6.15503	4.71901	3.40794
HTI	Americas	Latin America and the Caribbean	Haiti	-0.0174472	0.000272238	197	2020-05-17	2020-11-29	0.909675	0.00135021	20.713	20.2674	18.6538	15.8734	11.4305	9.43313	7.57028	6.02668	4.57222
PRY	Americas	Latin America and the Caribbean	Paraguay	-0.10346	0.00812905	21	2020-05-08	2020-05-28	0.562625	0.0261815	20.5735	20.2479	19.3681	17.3966	11.5207	9.24533	7.25203	5.65372	4.19572
USA	Americas	Northern America	United States of America	0.295904	0.0055655	21	2020-03-06	2020-03-26	4.3967	0.113704	15.5036	15.3336	14.9516	14.0039	10.9015	9.73467	8.40262	7.08713	5.64567
CAN	Americas	Northern America	Canada	0.19651	0.00896393	16	2020-03-16	2020-03-31	2.73964	0.119724	15.1724	15.0107	14.7588	14.1603	11.88	10.6782	9.23295	7.73508	6.19032
KAZ	Asia	Central Asia	Kazakhstan	0.0332808	0.00105263	69	2020-03-29	2020-06-05	1.19494	0.00667067	19.5382	19.3071	19.0478	18.1907	13.52	11.2834	9.30295	7.47234	5.52788
KGZ	Asia	Central Asia	Kyrgyzstan	0.0115097	0.00138831	64	2020-04-12	2020-06-14	1.06392	0.00792607	20.7131	20.4364	20.018	18.8725	11.4691	8.83531	6.92376	5.37556	3.8581
TJK	Asia	Central Asia	Tajikistan	-0.00522219	0.000202349	218	2020-05-04	2020-12-07	0.972155	0.00106531	25.7135	25.5054	25.0961	23.372	10.8897	8.03341	6.20265	4.76555	3.27531
UZB	Asia	Central Asia	Uzbekistan	-0.0113905	0.00184314	50	2020-04-06	2020-05-25	0.940164	0.00941617	27.38	27.2724	26.8203	24.7755	7.7181	5.27051	4.01819	3.03967	2.14356
KOR	Asia	Eastern Asia	Republic of Korea	0.216182	0.0137836	12	2020-02-22	2020-03-04	3.014	0.20058	16.3221	16.2518	16.0151	14.987	11.7425	10.7735	9.54281	8.06997	6.43747
JPN	Asia	Eastern Asia	Japan	0.0210821	0.00697861	21	2020-03-07	2020-03-27	1.11985	0.041719	13.1824	13.0223	12.7274	12.2283	11.1869	10.4463	9.37937	8.06753	6.37096
MNG	Asia	Eastern Asia	Mongolia	-0.0887945	0.0132111	15	2020-11-23	2020-12-07	0.61168	0.0458686	18.4886	18.0399	17.5522	16.4043	12.4948	9.73685	7.68964	5.81007	3.86014
PHL	Asia	South-eastern Asia	Philippines	0.177277	0.0116694	14	2020-03-22	2020-04-04	2.49332	0.143207	21.0816	20.7832	19.6127	17.1744	10.622	8.75176	7.1865	5.72093	4.25083
THA	Asia	South-eastern Asia	Thailand	0.0504704	0.00895579	17	2020-03-20	2020-04-05	1.30845	0.0615755	16.4866	16.2409	15.7299	14.9008	13.0825	11.7385	10.1046	8.29466	6.30035
SGP	Asia	South-eastern Asia	Singapore	0.0441664	0.00798226	19	2020-03-21	2020-04-08	1.26574	0.0532699	16.3578	16.255	15.8356	14.8436	12.5749	11.4161	9.99639	8.29694	6.42341
IDN	Asia	South-eastern Asia	Indonesia	0.0232299	0.000362468	130	2020-03-19	2020-07-26	1.13275	0.0021893	18.6966	18.499	17.9625	16.4546	11.3885	9.73408	8.03525	6.3608	4.64415
MYS	Asia	South-eastern Asia	Malaysia	0.015661	0.00304214	34	2020-03-15	2020-04-17	1.08786	0.0177188	17.8706	17.5443	16.8846	15.6378	12.263	9.84182	7.56569	5.79696	4.21566
VNM	Asia	South-eastern Asia	Viet Nam	-0.0931253	0.00511112	35	2020-08-03	2020-09-06	0.596809	0.0173575	18.2172	17.9198	17.4093	16.532	13.5941	11.8723	9.80185	7.88314	5.86741
IRN	Asia	Southern Asia	Iran (Islamic Republic of)	0.338426	0.0186546	10	2020-02-27	2020-03-07	5.34674	0.454361	18.0381	17.8396	17.3646	16.3587	11.5886	8.38126	5.65966	3.93008	2.62148
IND	Asia	Southern Asia	India	0.15103	0.00530596	23	2020-03-21	2020-04-12	2.18928	0.0579342	19.406	19.1289	18.0447	16.2974	10.3644	8.13416	6.46188	5.01626	3.61513
NPL	Asia	Southern Asia	Nepal	0.125215	0.00569391	23	2020-05-18	2020-06-09	1.92318	0.0553361	24.6603	24.4419	22.7519	19.0864	11.8901	10.1538	8.37302	6.7042	4.99378
BGD	Asia	Southern Asia	Bangladesh	0.0529022	0.00102789	64	2020-04-09	2020-06-11	1.32526	0.00714882	21.5406	21.3074	19.7408	15.2155	9.87758	7.83484	6.15195	4.67312	3.2033
PAK	Asia	Southern Asia	Pakistan	0.0464925	0.000546501	97	2020-03-16	2020-06-20	1.28135	0.00368748	26.1384	25.6646	20.9507	17.3914	8.05219	6.08152	4.89926	3.94941	2.9376
MDV	Asia	Southern Asia	Maldives	-0.0162186	0.00119881	71	2020-04-30	2020-07-09	0.915787	0.00598156	28.822	28.7333	28.3588	26.357	11.8494	8.1517	6.47539	5.10484	3.7609
LKA	Asia	Southern Asia	Sri Lanka	-0.0388445	0.00492297	28	2020-04-26	2020-05-23	0.808945	0.0219726	19.0059	18.8405	18.2702	16.8707	9.90007	7.85084	6.36038	4.96974	3.80369
TUR	Asia	Western Asia	Turkey	0.294286	0.0132684	12	2020-03-20	2020-03-31	4.36376	0.26925	17.4433	17.2381	16.5997	14.8226	9.61172	8.03649	6.41009	4.73889	3.25263
ISR	Asia	Western Asia	Israel	0.210749	0.0111862	14	2020-03-18	2020-03-31	2.93586	0.158986	15.1771	14.5612	13.6767	12.4011	10.5772	9.2866	7.73302	6.21822	4.63566
ARE	Asia	Western Asia	United Arab Emirates	0.142361	0.00687416	20	2020-03-25	2020-04-13	2.09645	0.0721907	21.5037	21.0707	20.6135	20.2893	19.6775	17.3748	12.3139	7.83744	4.54688
QAT	Asia	Western Asia	Qatar	0.0959307	0.0364788	7	2020-03-11	2020-03-17	1.65677	0.310065	23.5287	23.2743	23.0216	22.8467	22.3581	19.739	14.7067	10.233	6.31001
JOR	Asia	Western Asia	Jordan	0.0855854	0.00159766	51	2020-08-22	2020-10-11	1.57091	0.0129458	22.1767	21.763	20.071	16.9797	9.53457	6.25157	4.19647	2.63645	1.63487
SAU	Asia	Western Asia	Saudi Arabia	0.0850902	0.00193475	44	2020-03-19	2020-05-01	1.5669	0.0156413	18.6111	18.1596	16.5159	13.9245	11.0731	9.79287	8.09921	5.89546	3.60764
KWT	Asia	Western Asia	Kuwait	0.066279	0.00156225	51	2020-04-04	2020-05-24	1.42129	0.0115701	19.0249	18.5815	17.4986	16.8182	15.9672	14.3639	10.9917	7.46533	4.59475
GEO	Asia	Western Asia	Georgia	0.0588817	0.000960658	68	2020-09-08	2020-11-14	1.36744	0.00687199	15.6932	15.5318	15.18	14.5009	12.0948	10.7159	9.20042	7.7365	6.15555
OMN	Asia	Western Asia	Oman	0.0447252	0.000777161	81	2020-04-09	2020-06-28	1.26948	0.00520016	18.7795	18.2667	17.8025	17.3864	16.1939	13.4626	8.19759	4.93038	3.16727
ARM	Asia	Western Asia	Armenia	0.0407558	0.000781524	84	2020-03-28	2020-06-19	1.24316	0.00513186	17.0974	16.9704	16.6807	16.0346	12.0304	10.0753	8.32722	6.85163	5.52141
BHR	Asia	Western Asia	Bahrain	0.0348096	0.000869487	77	2020-04-04	2020-06-19	1.20467	0.00555033	18.6388	18.1972	17.6396	17.1526	16.2902	14.4955	10.5291	7.38542	4.83858
AZE	Asia	Western Asia	Azerbaijan	0.0309146	0.000551764	105	2020-03-31	2020-07-13	1.18003	0.00345738	20.3849	20.2525	20.0045	19.0411	13.1488	11.0643	9.22662	7.63657	5.65605
IRQ	Asia	Western Asia	Iraq	0.0132984	0.00148944	57	2020-03-27	2020-05-22	1.07417	0.00857706	25.1589	24.5711	22.9046	20.7454	10.0104	7.96181	6.42696	5.13924	3.94552
SYR	Asia	Western Asia	Syrian Arab Republic	0.00176319	0.000457254	125	2020-08-05	2020-12-07	1.00956	0.00249038	21.5522	21.1569	19.7152	17.115	8.11612	5.83746	4.40343	3.37786	2.39196
YEM	Asia	Western Asia	Yemen	-0.0260496	0.000885122	103	2020-06-13	2020-09-23	0.867898	0.00420831	26.2906	25.8693	24.6822	22.4749	8.16	4.41731	3.0593	2.2418	1.68321
CYP	Asia	Western Asia	Cyprus	-0.0457565	0.00155377	78	2020-04-02	2020-06-18	0.778618	0.00670086	15.6622	15.4776	15.213	14.6705	12.8771	11.3115	9.2522	7.32592	5.51434
LBN	Asia	Western Asia	Lebanon	-0.0546154	0.00330581	42	2020-03-26	2020-05-06	0.741244	0.0136404	17.0594	16.8712	16.2909	14.6225	9.4239	6.84765	5.29576	4.10717	3.06237
BLR	Europe	Eastern Europe	Belarus	0.199604	0.0116417	14	2020-04-02	2020-04-15	2.78125	0.157609	14.9168	14.7065	14.4964	14.1075	12.3676	10.8391	9.07978	7.40226	5.62179
RUS	Europe	Eastern Europe	Russian Federation	0.154026	0.00301053	32	2020-03-21	2020-04-21	2.22222	0.033315	15.2101	14.9859	14.732	14.3878	13.0163	11.3247	9.45829	7.66126	5.82864
ROU	Europe	Eastern Europe	Romania	0.148521	0.00816734	18	2020-03-18	2020-04-04	2.16204	0.088179	13.805	13.5732	13.2173	12.6641	11.5845	10.3619	8.92562	7.14012	5.2518
CZE	Europe	Eastern Europe	Czechia	0.113826	0.00736212	19	2020-03-15	2020-04-02	1.81531	0.0679322	14.9098	14.7558	14.3425	13.8604	12.6045	11.6717	10.3426	8.51802	6.23526
POL	Europe	Eastern Europe	Poland	0.107467	0.00513855	24	2020-03-17	2020-04-09	1.75748	0.0460553	17.0726	16.9885	16.8093	16.2123	14.5467	12.41	9.80624	7.92469	6.159
HUN	Europe	Eastern Europe	Hungary	0.0295282	0.00329065	34	2020-03-27	2020-04-29	1.17137	0.0204834	13.7124	13.5229	13.2128	12.6881	11.3121	10.4064	9.21038	7.54566	5.53912
SVK	Europe	Eastern Europe	Slovakia	0.0240235	0.00821214	19	2020-04-07	2020-04-25	1.13755	0.0497902	16.036	15.9225	15.6122	14.9206	12.7789	11.5264	9.86364	7.93734	5.89717
UKR	Europe	Eastern Europe	Ukraine	0.017778	0.000120271	256	2020-03-27	2020-12-07	1.10025	0.000707679	15.0248	14.9148	14.6205	14.1725	12.0551	10.6469	8.76212	7.09798	5.43451
BGR	Europe	Eastern Europe	Bulgaria	-0.0097916	0.00265054	41	2020-04-17	2020-05-27	0.948364	0.0136471	13.3743	13.1528	12.8625	12.4767	11.5194	10.5483	9.22299	7.6647	5.97442
GBR	Europe	Northern Europe	United Kingdom of Great Britain and Northern Ireland	0.184385	0.00474393	24	2020-03-05	2020-03-28	2.58193	0.0600736	11.6794	11.5243	11.195	10.6581	8.61855	7.70949	6.62736	5.6987	4.60385
IRL	Europe	Northern Europe	Ireland	0.0820551	0.00309184	32	2020-03-18	2020-04-18	1.54253	0.0246461	14.8494	14.5798	13.7689	12.4475	11.0641	10.1204	8.61109	6.80036	5.02846
SWE	Europe	Northern Europe	Sweden	0.0690519	0.00256826	37	2020-03-08	2020-04-13	1.44196	0.019269	14.9511	14.7441	14.4786	14.0162	12.185	11.0909	9.75505	8.2713	6.53695
FIN	Europe	Northern Europe	Finland	0.0523313	0.00368948	31	2020-03-14	2020-04-13	1.3213	0.0255908	13.7205	13.4023	13.0262	12.4686	11.8732	11.217	9.57495	8.19345	7.10806
DNK	Europe	Northern Europe	Denmark	0.0503163	0.00296467	34	2020-03-10	2020-04-12	1.30739	0.0203688	14.8968	14.7251	14.417	13.6334	11.4523	10.4868	9.28422	7.95185	6.30137
EST	Europe	Northern Europe	Estonia	0.0393188	0.00581249	24	2020-03-17	2020-04-09	1.23376	0.037908	14.1149	13.8247	13.5302	13.2022	12.2319	11.0126	9.56164	8.02955	6.31325
ISL	Europe	Northern Europe	Iceland	0.0193022	0.00683175	21	2020-03-19	2020-04-08	1.10925	0.0404937	16.5794	16.3141	15.965	15.1288	12.4213	11.1594	9.70677	8.14397	6.45385
LTU	Europe	Northern Europe	Lithuania	-0.0152768	0.0036508	33	2020-03-25	2020-04-26	0.920497	0.0183001	16.2788	16.1397	15.6908	14.3348	12.1969	11.002	9.42488	7.70804	5.70483
LVA	Europe	Northern Europe	Latvia	-0.0309562	0.00139363	84	2020-04-01	2020-06-23	0.844849	0.00646769	14.8039	14.6137	14.401	14.103	12.602	11.0447	9.3264	7.79592	6.10528
ESP	Europe	Southern Europe	Spain	0.33866	0.013927	12	2020-03-05	2020-03-16	5.35244	0.339538	13.929	13.6531	13.2703	12.8847	12.168	11.3143	9.88039	8.0171	5.92465
PRT	Europe	Southern Europe	Portugal	0.210581	0.010245	15	2020-03-15	2020-03-29	2.93348	0.145503	13.9183	13.7463	13.3864	12.7768	11.7641	10.9054	9.52666	7.81693	5.85721
ITA	Europe	Southern Europe	Italy	0.202664	0.00577078	21	2020-02-24	2020-03-15	2.82295	0.0791783	17.045	16.7639	16.4037	15.474	14.3119	13.0673	11.3615	9.74982	7.16257
SRB	Europe	Southern Europe	Serbia	0.0900101	0.00427712	27	2020-03-24	2020-04-19	1.60713	0.0353746	13.4772	13.3324	13.025	12.3668	10.7098	9.81973	8.50931	6.988	5.47581
GRC	Europe	Southern Europe	Greece	0.0408546	0.00554626	24	2020-03-15	2020-04-07	1.24381	0.0364364	13.9098	13.7866	13.351	12.6181	11.1848	10.3491	8.98059	7.29574	5.42145
MNE	Europe	Southern Europe	Montenegro	0.0379453	0.0143825	13	2020-07-03	2020-07-15	1.22483	0.0931899	15.3837	15.2433	14.903	13.6519	10.3017	9.17823	7.69597	6.11636	4.54209
MLT	Europe	Southern Europe	Malta	0.0148624	0.000495859	119	2020-08-09	2020-12-05	1.08321	0.00287703	15.7672	15.7133	15.5123	14.7921	10.8195	9.32082	7.69203	6.16416	4.89393
ALB	Europe	Southern Europe	Albania	0.0107557	0.000336357	147	2020-06-13	2020-11-06	1.05962	0.00191334	18.414	18.3374	18.1268	16.9831	10.4545	8.88665	7.61776	6.42485	5.09621
HRV	Europe	Southern Europe	Croatia	-0.00504831	0.0044641	28	2020-03-23	2020-04-19	0.973071	0.023522	13.6144	13.4644	13.1836	12.3156	10.666	9.67709	8.19028	6.69296	5.28095
SVN	Europe	Southern Europe	Slovenia	-0.0140558	0.00323355	37	2020-03-16	2020-04-21	0.926635	0.0163057	14.056	13.7929	13.5025	13.0829	12.2363	11.283	9.71103	7.87016	5.88482
MKD	Europe	Southern Europe	North Macedonia	-0.0157419	0.00169145	56	2020-04-03	2020-05-28	0.918168	0.00845935	16.414	16.308	16.0605	15.135	11.5431	10.1297	8.42352	6.8462	5.2486
BIH	Europe	Southern Europe	Bosnia and Herzegovina	-0.0178653	0.0012376	70	2020-03-30	2020-06-07	0.907603	0.0061255	16.6527	16.6158	16.3446	15.0365	8.02311	6.58446	5.73628	5.03906	4.29218
AND	Europe	Southern Europe	Andorra	-0.0701912	0.00428635	37	2020-03-28	2020-05-03	0.679422	0.016355	14.3946	14.2879	13.6565	12.4579	11.1152	10.3941	9.15608	7.40954	5.34571
DEU	Europe	Western Europe	Germany	0.23954	0.00665448	19	2020-03-04	2020-03-22	3.37166	0.107102	8.51432	8.40294	8.29946	8.00964	6.77168	6.09979	5.50734	4.73761	3.86925
CHE	Europe	Western Europe	Switzerland	0.202301	0.00698813	19	2020-03-07	2020-03-25	2.81798	0.0957292	16.3249	16.2603	15.9904	15.1408	12.6006	11.5472	10.1123	8.60602	6.95846
FRA	Europe	Western Europe	France	0.192858	0.00620615	20	2020-03-04	2020-03-23	2.69126	0.0815737	14.0494	13.7834	13.3731	12.6945	11.3402	10.2635	8.92759	7.51104	5.77205
AUT	Europe	Western Europe	Austria	0.189401	0.00836057	17	2020-03-11	2020-03-27	2.64616	0.108235	16.0068	15.9428	15.6941	14.9984	11.8715	10.7845	9.39585	7.95013	6.27721
BEL	Europe	Western Europe	Belgium	0.168822	0.00492239	24	2020-03-09	2020-04-01	2.39148	0.0581861	13.6303	13.4108	13.1357	12.4559	11.4732	10.0893	8.83712	7.28218	6.08649
NLD	Europe	Western Europe	Netherlands	0.155045	0.00522969	23	2020-03-08	2020-03-30	2.23352	0.058137	18.1345	17.9995	17.3954	16.3406	14.7854	13.824	12.7841	11.0806	8.2857
LUX	Europe	Western Europe	Luxembourg	-0.053403	0.00104514	86	2020-03-19	2020-06-12	0.746262	0.00433866	19.6908	19.5842	19.0165	17.9671	16.0126	15.0691	13.3784	10.8685	8.78458
AUS	Oceania	Australia and New Zealand	Australia	0.193604	0.0116484	14	2020-03-15	2020-03-28	2.70108	0.153609	15.333	15.1347	14.7528	13.9463	11.4216	10.1544	8.68191	7.25265	5.67427
NZL	Oceania	Australia and New Zealand	New Zealand	0.0147478	0.00935966	17	2020-03-26	2020-04-11	1.08255	0.0542758	15.7704	15.5256	15.1603	14.3646	11.7609	10.4722	9.15721	7.85656	6.37863

## Sheet: ESP
Column1	Column2	Column3	Column4	Column5	Column6
Input	../Output/Countries/ESP.dat
Flat	no	Result	f(y)~beta0+beta1*y
Regression	asymptotic	c	2	Include	left
Range	0	11
beta0	3.56762	error	0.0988024
beta1	0.33866	error	0.013927
X	Y	Error	Weight
0	3.55125	0.200567	1				0	3.55125	0.200567	3.56762
1	3.96217	0.189882	1				1	3.96217	0.189882	3.90628
2	4.17439	0.184993	1				2	4.17439	0.184993	4.24494
3	4.43252	0.179525	1				3	4.43252	0.179525	4.5836
4	4.91371	0.170509	1				4	4.91371	0.170509	4.92226
5	5.38711	0.162844	1				5	5.38711	0.162844	5.26092
6	5.68212	0.158561	1				6	5.68212	0.158561	5.59958
7	5.66395	0.158815	1				7	5.66395	0.158815	5.93824
8	6.53711	0.147829	1				8	6.53711	0.147829	6.2769
9	6.73527	0.145638	1				9	6.73527	0.145638	6.61556
10	6.92546	0.143624	1				10	6.92546	0.143624	6.95422
11	7.14441	0.141406	1				11	7.14441	0.141406	7.29288
12	7.26972	0.140182	0				12	7.26972	0.140182
13	7.41569	0.138795	0				13	7.41569	0.138795
14	7.71461	0.13608	0				14	7.71461	0.13608
15	7.68169	0.136371	0				15	7.68169	0.136371
16	7.90539	0.134428	0				16	7.90539	0.134428
17	8.00494	0.133589	0				17	8.00494	0.133589
18	8.18845	0.132084	0				18	8.18845	0.132084
19	8.29893	0.131202	0				19	8.29893	0.131202
20	8.53433	0.12938	0				20	8.53433	0.12938
21	8.64629	0.128539	0				21	8.64629	0.128539
22	8.77535	0.127591	0				22	8.77535	0.127591
23	8.83015	0.127194	0				23	8.83015	0.127194
24	8.90035	0.126691	0				24	8.90035	0.126691
25	8.92873	0.12649	0				25	8.92873	0.12649
26	8.98788	0.126073	0				26	8.98788	0.126073
27	8.96193	0.126255	0				27	8.96193	0.126255
28	8.95598	0.126297	0				28	8.95598	0.126297
29	8.94115	0.126402	0				29	8.94115	0.126402
30	8.93087	0.126475	0				30	8.93087	0.126475
31	8.90413	0.126665	0
32	8.84791	0.127066	0
33	8.7909	0.127478	0
34	8.74835	0.127787	0
35	8.67924	0.128295	0
36	8.6273	0.128681	0
37	8.56894	0.129118	0
38	8.52247	0.12947	0
39	8.47112	0.129862	0
40	8.38281	0.130544	0
41	8.34366	0.13085	0
42	8.41898	0.130263	0
43	8.44511	0.130061	0
44	8.31871	0.131046	0
45	8.42266	0.130235	0
46	8.36674	0.130669	0
47	8.41617	0.130285	0
48	8.38757	0.130507	0
49	8.29676	0.131219	0
50	7.45926	0.13839	0
51	7.61361	0.13698	0
52	7.15461	0.141305	0
53	7.18701	0.140986	0
54	6.84816	0.144432	0
55	6.47213	0.148569	0
56	4.07268	0.187288	0
57	7.46541	0.138332	0
58	7.32994	0.139605	0
59	7.24749	0.140397	0
60	7.10731	0.141775	0
61	7.10848	0.141763	0
62	6.96441	0.143222	0
63	7.04279	0.142423	0
64	6.99537	0.142904	0
65	6.90718	0.143814	0
66	6.89105	0.143982	0
67	7.20521	0.140808	0
68	7.12528	0.141596	0
69	7.08602	0.141987	0
70	7.05284	0.142321	0
71	6.95327	0.143336	0
72	6.92475	0.143631	0
73	6.80999	0.144836	0
74	6.38976	0.149523	0
75	6.34989	0.149992	0
76	6.31355	0.150423	0
77	6.21375	0.151626	0
78	6.49678	0.148287	0
79	6.48616	0.148408	0
80	6.58597	0.147279	0
81	6.29527	0.150641	0
82	6.40215	0.149378	0
83	6.27126	0.150929	0
84	6.54473	0.147742	0
85	6.28093	0.150813	0
86	6.33252	0.150198	0
87	6.27207	0.15092	0
88	6.40594	0.149334	0
89	6.26285	0.151031	0
90	6.36475	0.149817	0
91	5.9749	0.154627	0
92	5.84313	0.156361	0
93	5.69518	0.158379	0
94	5.68988	0.158453	0
95	5.69373	0.158399	0
96	5.67185	0.158704	0
97	5.63172	0.159269	0
98	5.67822	0.158615	0
99	5.76429	0.157427	0
100	5.79258	0.157042	0
101	5.8281	0.156562	0
102	5.83397	0.156484	0
103	5.82135	0.156653	0
104	5.83856	0.156422	0
105	5.90224	0.155576	0
106	5.82305	0.15663	0
107	5.809	0.15682	0
108	5.8137	0.156756	0
109	5.83523	0.156467	0
110	5.84727	0.156306	0
111	5.83856	0.156422	0
112	5.75845	0.157506	0
113	5.80771	0.156837	0
114	5.89046	0.155731	0
115	5.87734	0.155905	0
116	5.86444	0.156077	0
117	5.88571	0.155794	0
118	5.90692	0.155514	0
119	5.92387	0.155292	0
120	5.93262	0.155177	0
121	5.69229	0.158419	0
122	5.53564	0.160645	0
123	5.99823	0.154326	0
124	6.01232	0.154145	0
125	6.01057	0.154168	0
126	6.04467	0.153732	0
127	6.17468	0.152105	0
128	6.17468	0.152105	0
129	6.17468	0.152105	0
130	6.38832	0.14954	0
131	6.46348	0.148668	0
132	6.56747	0.147486	0
133	6.71953	0.145808	0
134	6.80983	0.144838	0
135	6.80983	0.144838	0
136	6.80983	0.144838	0
137	7.14598	0.14139	0
138	7.221	0.140654	0
139	7.27011	0.140178	0
140	7.38762	0.139059	0
141	7.46049	0.138378	0
142	7.46049	0.138378	0
143	7.46049	0.138378	0
144	7.59704	0.137129	0
145	7.63018	0.136831	0
146	7.67588	0.136423	0
147	7.68734	0.136321	0
148	7.74073	0.13585	0
149	7.74073	0.13585	0
150	7.74073	0.13585	0
151	7.86721	0.134754	0
152	8.06212	0.133115	0
153	8.1028	0.13278	0
154	8.15745	0.132335	0
155	8.21377	0.13188	0
156	8.21377	0.13188	0
157	8.21377	0.13188	0
158	8.21709	0.131854	0
159	8.13145	0.132546	0
160	8.14061	0.132472	0
161	8.27527	0.131389	0
162	8.31003	0.131114	0
163	8.31003	0.131114	0
164	8.31003	0.131114	0
165	8.54819	0.129275	0
166	8.58842	0.128972	0
167	8.67744	0.128308	0
168	8.66492	0.128401	0
169	8.72863	0.127932	0
170	8.72863	0.127932	0
171	8.72863	0.127932	0
172	8.79815	0.127425	0
173	8.84046	0.12712	0
174	8.8533	0.127028	0
175	8.90539	0.126656	0
176	8.93651	0.126435	0
177	8.93651	0.126435	0
178	8.93651	0.126435	0
179	9.01227	0.125902	0
180	9.0295	0.125782	0
181	9.05126	0.125631	0
182	9.03948	0.125713	0
183	9.05123	0.125631	0
184	9.05123	0.125631	0
185	9.05123	0.125631	0
186	9.10006	0.125294	0
187	9.11351	0.125201	0
188	9.11799	0.12517	0
189	9.14588	0.124979	0
190	9.17155	0.124804	0
191	9.17155	0.124804	0
192	9.17155	0.124804	0
193	9.18401	0.12472	0
194	9.19092	0.124673	0
195	9.22426	0.124447	0
196	9.23165	0.124397	0
197	9.26204	0.124193	0
198	9.26204	0.124193	0
199	9.26204	0.124193	0
200	9.31519	0.123838	0
201	9.33256	0.123723	0
202	9.33377	0.123715	0
203	9.32568	0.123769	0
204	9.29836	0.12395	0
205	9.29836	0.12395	0
206	9.29836	0.12395	0
207	9.30302	0.123919	0
208	9.15148	0.124941	0
209	9.28773	0.124021	0
210	9.27127	0.124131	0
211	9.25846	0.124217	0
212	9.25846	0.124217	0
213	9.25846	0.124217	0
214	9.13848	0.12503	0
215	9.30752	0.123889	0
216	9.16225	0.124868	0
217	9.20629	0.124569	0
218	9.22706	0.124428	0
219	9.22706	0.124428	0
220	9.22706	0.124428	0
221	9.28672	0.124028	0
222	9.21995	0.124476	0
223	9.24066	0.124337	0
224	9.25299	0.124254	0
225	9.28529	0.124038	0
226	9.28529	0.124038	0
227	9.28529	0.124038	0
228	9.41014	0.123212	0
229	9.4862	0.122717	0
230	9.53902	0.122377	0
231	9.61492	0.121893	0
232	9.65843	0.121618	0
233	9.65843	0.121618	0
234	9.65843	0.121618	0
235	9.78109	0.120853	0
236	9.81712	0.120631	0
237	9.83863	0.120499	0
238	9.85821	0.120379	0
239	9.90024	0.120124	0
240	9.90024	0.120124	0
241	9.90024	0.120124	0
242	9.92032	0.120002	0
243	9.92208	0.119991	0
244	9.95842	0.119772	0
245	9.94705	0.119841	0
246	9.92577	0.119969	0
247	9.92577	0.119969	0
248	9.92577	0.119969	0
249	9.9072	0.120081	0
250	9.76465	0.120955	0
251	9.85445	0.120402	0
252	9.83631	0.120513	0
253	9.82752	0.120567	0
254	9.82752	0.120567	0
255	9.82752	0.120567	0
256	9.71238	0.12128	0
257	9.82015	0.120612	0
258	9.64056	0.121731	0
259	9.60963	0.121926	0
260	9.54823	0.122318	0
261	9.54823	0.122318	0
262	9.54823	0.122318	0
263	9.4133	0.123191	0
264	9.40239	0.123263	0
265	9.34043	0.123671	0
266	9.28969	0.124008	0
267	9.23123	0.1244	0
268	9.23123	0.1244	0
269	9.23123	0.1244	0
270	9.14498	0.124985	0
271	9.08251	0.125415	0
272	9.06794	0.125515	0
273	9.03167	0.125767	0
274	8.99501	0.126023	0
275	8.99501	0.126023	0
276	8.99501	0.126023	0
277	8.95344	0.126315	0

## Sheet: DEU
Column1	Column2	Column3	Column4	Column5	Column6
Input	../Output/Countries/DEU.dat
Flat	no	Result	f(y)~beta0+beta1*y
Regression	asymptotic	c	2	Include	left
Range	0	18
beta0	3.83341	error	0.0766294
beta1	0.23954	error	0.00665448
X	Y	Error	Weight
0	3.51366	0.201637	1				0	3.51366	0.201637	3.83341
1	4.13174	0.185945	1				1	4.13174	0.185945	4.07295
2	4.48703	0.178432	1				2	4.48703	0.178432	4.31249
3	4.63334	0.175592	1				3	4.63334	0.175592	4.55203
4	4.86753	0.171315	1				4	4.86753	0.171315	4.79157
5	4.9787	0.169392	1				5	4.9787	0.169392	5.03111
6	5.19375	0.165848	1				6	5.19375	0.165848	5.27065
7	5.46019	0.161751	1				7	5.46019	0.161751	5.51019
8	5.42935	0.16221	1				8	5.42935	0.16221	5.74973
9	6.06212	0.153511	1				9	6.06212	0.153511	5.98927
10	6.29315	0.150667	1				10	6.29315	0.150667	6.22881
11	6.52104	0.14801	1				11	6.52104	0.14801	6.46835
12	6.76948	0.145269	1				12	6.76948	0.145269	6.70789
13	7.01597	0.142694	1				13	7.01597	0.142694	6.94743
14	7.30548	0.139838	1				14	7.30548	0.139838	7.18697
15	7.54524	0.137599	1				15	7.54524	0.137599	7.42651
16	7.74519	0.135811	1				16	7.74519	0.135811	7.66605
17	7.83133	0.135062	1				17	7.83133	0.135062	7.90559
18	7.91038	0.134385	1				18	7.91038	0.134385	8.14513
19	8.04302	0.133273	0				19	8.04302	0.133273
20	8.12854	0.13257	0				20	8.12854	0.13257
21	8.18056	0.132148	0				21	8.18056	0.132148
22	8.31588	0.131068	0				22	8.31588	0.131068
23	8.39657	0.130437	0				23	8.39657	0.130437
24	8.53087	0.129406	0				24	8.53087	0.129406
25	8.57874	0.129044	0				25	8.57874	0.129044
26	8.59492	0.128923	0				26	8.59492	0.128923
27	8.62083	0.128729	0				27	8.62083	0.128729
28	8.66436	0.128405	0				28	8.66436	0.128405
29	8.6719	0.128349	0				29	8.6719	0.128349
30	8.6579	0.128453	0				30	8.6579	0.128453
31	8.60983	0.128811	0
32	8.60017	0.128884	0
33	8.55886	0.129194	0
34	8.54133	0.129327	0
35	8.52923	0.129418	0
36	8.47001	0.12987	0
37	8.39622	0.130439	0
38	8.32278	0.131014	0
39	8.2844	0.131317	0
40	8.24643	0.131619	0
41	8.12715	0.132581	0
42	8.0279	0.133398	0
43	7.93313	0.134193	0
44	7.91811	0.13432	0
45	7.87604	0.134678	0
46	7.81428	0.135209	0
47	7.79465	0.135379	0
48	7.79105	0.135411	0
49	7.72785	0.135963	0
50	7.69822	0.136225	0
51	7.57206	0.137355	0
52	7.53986	0.137648	0
53	7.49443	0.138064	0
54	7.42084	0.138747	0
55	7.41466	0.138805	0
56	7.34978	0.139416	0
57	7.25236	0.14035	0
58	7.1677	0.141176	0
59	7.09649	0.141883	0
60	7.02795	0.142573	0
61	6.96251	0.143241	0
62	6.92124	0.143668	0
63	6.85239	0.144388	0
64	6.82142	0.144715	0
65	6.83534	0.144568	0
66	6.8114	0.144821	0
67	6.78881	0.145062	0
68	6.82189	0.14471	0
69	6.78057	0.14515	0
70	6.74288	0.145555	0
71	6.58084	0.147337	0
72	6.49764	0.148277	0
73	6.44979	0.148826	0
74	6.4637	0.148666	0
75	6.34187	0.150087	0
76	6.48942	0.148371	0
77	6.43775	0.148965	0
78	6.47543	0.148531	0
79	6.4608	0.148699	0
80	6.40499	0.149345	0
81	6.33784	0.150134	0
82	6.36032	0.149869	0
83	6.19207	0.151891	0
84	6.07731	0.153319	0
85	6.11715	0.152819	0
86	6.12874	0.152674	0
87	6.12593	0.152709	0
88	6.08742	0.153191	0
89	6.05846	0.153557	0
90	5.94729	0.154986	0
91	5.9162	0.155392	0
92	5.78427	0.157155	0
93	5.65599	0.158927	0
94	5.77765	0.157244	0
95	5.812	0.156779	0
96	5.88412	0.155815	0
97	5.92769	0.155242	0
98	5.83773	0.156433	0
99	5.7589	0.1575	0
100	5.79562	0.157	0
101	5.55903	0.160307	0
102	5.53169	0.160702	0
103	5.41483	0.162427	0
104	5.51917	0.160884	0
105	5.69518	0.158379	0
106	6.1016	0.153013	0
107	6.0845	0.153228	0
108	6.1865	0.15196	0
109	6.28467	0.150768	0
110	6.36941	0.149762	0
111	6.40357	0.149362	0
112	6.41275	0.149255	0
113	6.22992	0.151429	0
114	6.28013	0.150823	0
115	6.29368	0.15066	0
116	6.19178	0.151895	0
117	6.14786	0.152437	0
118	6.03957	0.153797	0
119	6.06776	0.153439	0
120	6.06013	0.153536	0
121	5.97126	0.154674	0
122	5.9698	0.154693	0
123	6.00212	0.154276	0
124	6.06776	0.153439	0
125	6.03514	0.153853	0
126	5.9936	0.154386	0
127	5.92921	0.155222	0
128	5.89872	0.155622	0
129	5.88253	0.155836	0
130	5.83565	0.156461	0
131	5.71137	0.158154	0
132	5.70995	0.158174	0
133	5.7462	0.157674	0
134	5.85752	0.156169	0
135	5.9599	0.154822	0
136	5.96137	0.154802	0
137	5.99716	0.15434	0
138	6.10766	0.152937	0
139	6.14388	0.152486	0
140	6.18149	0.152021	0
141	6.1947	0.151859	0
142	6.23665	0.151348	0
143	6.31044	0.15046	0
144	6.33099	0.150216	0
145	6.29342	0.150663	0
146	6.34564	0.150042	0
147	6.41346	0.149247	0
148	6.49957	0.148255	0
149	6.52545	0.14796	0
150	6.51514	0.148078	0
151	6.47763	0.148506	0
152	6.57108	0.147446	0
153	6.59519	0.147176	0
154	6.6787	0.146253	0
155	6.66732	0.146378	0
156	6.71919	0.145812	0
157	6.73646	0.145625	0
158	6.76487	0.145319	0
159	6.81767	0.144755	0
160	6.86574	0.144247	0
161	6.8708	0.144194	0
162	6.94174	0.143455	0
163	6.98933	0.142966	0
164	6.98802	0.14298	0
165	7.00553	0.142801	0
166	7.065	0.142198	0
167	7.11128	0.141735	0
168	7.14192	0.141431	0
169	7.16029	0.141249	0
170	7.18517	0.141004	0
171	7.19968	0.140862	0
172	7.21177	0.140744	0
173	7.20489	0.140811	0
174	7.20923	0.140769	0
175	7.19229	0.140935	0
176	7.1896	0.140961	0
177	7.16979	0.141155	0
178	7.15618	0.14129	0
179	7.13785	0.141471	0
180	7.12287	0.14162	0
181	7.09388	0.141909	0
182	7.0902	0.141946	0
183	7.07436	0.142104	0
184	7.06072	0.142242	0
185	7.06878	0.14216	0
186	7.09281	0.141919	0
187	7.13932	0.141456	0
188	7.15261	0.141325	0
189	7.16151	0.141237	0
190	7.19283	0.140929	0
191	7.20807	0.14078	0
192	7.24003	0.140469	0
193	7.26533	0.140224	0
194	7.22319	0.140633	0
195	7.27011	0.140178	0
196	7.30711	0.139823	0
197	7.35052	0.139409	0
198	7.40524	0.138893	0
199	7.45629	0.138417	0
200	7.46557	0.138331	0
201	7.47453	0.138248	0
202	7.47938	0.138203	0
203	7.45967	0.138386	0
204	7.47128	0.138278	0
205	7.48477	0.138153	0
206	7.45455	0.138433	0
207	7.47744	0.138221	0
208	7.53224	0.137717	0
209	7.53132	0.137726	0
210	7.59287	0.137166	0
211	7.61459	0.136971	0
212	7.6471	0.136679	0
213	7.66996	0.136475	0
214	7.68537	0.136338	0
215	7.73705	0.135882	0
216	7.77462	0.135554	0
217	7.86458	0.134776	0
218	7.97748	0.133819	0
219	8.05837	0.133146	0
220	8.11612	0.132671	0
221	8.1701	0.132232	0
222	8.30035	0.131191	0
223	8.36926	0.130649	0
224	8.4689	0.129879	0
225	8.54996	0.129261	0
226	8.63325	0.128636	0
227	8.68031	0.128287	0
228	8.7081	0.128082	0
229	8.75098	0.127768	0
230	8.8388	0.127132	0
231	8.94031	0.126408	0
232	8.9086	0.126633	0
233	9.01446	0.125887	0
234	9.10726	0.125244	0
235	9.19634	0.124636	0
236	9.2549	0.124241	0
237	9.31635	0.123831	0
238	9.36489	0.123509	0
239	9.51023	0.122562	0
240	9.57087	0.122173	0
241	9.60606	0.121949	0
242	9.63138	0.121789	0
243	9.74382	0.121084	0
244	9.69551	0.121385	0
245	9.82158	0.120604	0
246	9.85083	0.120424	0
247	9.87638	0.120269	0
248	9.87688	0.120266	0
249	9.89111	0.120179	0
250	9.74556	0.121073	0
251	9.89316	0.120166	0
252	9.8254	0.12058	0
253	9.84207	0.120478	0
254	9.83781	0.120504	0
255	9.84176	0.12048	0
256	9.75202	0.121033	0
257	9.81684	0.120633	0
258	9.81438	0.120648	0
259	9.82468	0.120585	0
260	9.81927	0.120618	0
261	9.82185	0.120602	0
262	9.81588	0.120639	0
263	9.82492	0.120583	0
264	9.82395	0.120589	0
265	9.74462	0.121079	0
266	9.81696	0.120632	0
267	9.80054	0.120733	0
268	9.7864	0.12082	0
269	9.78618	0.120822	0
270	9.77666	0.12088	0
271	9.77476	0.120892	0
272	9.84075	0.120486	0
273	9.76647	0.120943	0
274	9.77982	0.120861	0
275	9.73983	0.121109	0
276	9.83816	0.120502	0
277	9.8953	0.120153	0
278	9.8301	0.120551	0

## Sheet: AUS
Column1	Column2	Column3	Column4	Column5	Column6
Input	../Output/Countries/AUS.dat
Flat	no	Result	f(y)~beta0+beta1*y
Regression	asymptotic	c	2	Include	left
Range	0	13
beta0	3.57443	error	0.0952436
beta1	0.193604	error	0.0116484
X	Y	Error	Weight
0	3.45224	0.203423	1				0	3.45224	0.203423	3.57443
1	3.71008	0.196227	1				1	3.71008	0.196227	3.76803
2	3.89764	0.191448	1				2	3.89764	0.191448	3.96164
3	4.14086	0.18574	1				3	4.14086	0.18574	4.15524
4	4.36945	0.180816	1				4	4.36945	0.180816	4.34885
5	4.43591	0.179457	1				5	4.43591	0.179457	4.54245
6	4.76462	0.173156	1				6	4.76462	0.173156	4.73605
7	5.18659	0.165963	1				7	5.18659	0.165963	4.92966
8	5.22805	0.165303	1				8	5.22805	0.165303	5.12326
9	5.42684	0.162247	1				9	5.42684	0.162247	5.31687
10	5.54741	0.160474	1				10	5.54741	0.160474	5.51047
11	5.7175	0.158069	1				11	5.7175	0.158069	5.70407
12	5.81711	0.15671	1				12	5.81711	0.15671	5.89768
13	5.90536	0.155535	1				13	5.90536	0.155535	6.09128
14	5.85179	0.156245	0				14	5.85179	0.156245
15	5.94729	0.154986	0				15	5.94729	0.154986
16	5.88412	0.155815	0				16	5.88412	0.155815
17	5.87734	0.155905	0				17	5.87734	0.155905
18	5.79736	0.156977	0				18	5.79736	0.156977
19	5.74438	0.157699	0				19	5.74438	0.157699
20	5.60895	0.159592	0				20	5.60895	0.159592
21	5.49424	0.161249	0				21	5.49424	0.161249
22	5.32371	0.163811	0				22	5.32371	0.163811
23	5.25152	0.164933	0				23	5.25152	0.164933
24	5.09987	0.167368	0				24	5.09987	0.167368
25	4.95381	0.169817	0				25	4.95381	0.169817
26	4.83968	0.171808	0				26	4.83968	0.171808
27	4.67815	0.174749	0				27	4.67815	0.174749
28	4.49663	0.178241	0				28	4.49663	0.178241
29	4.37126	0.180779	0				29	4.37126	0.180779
30	4.30792	0.182103	0				30	4.30792	0.182103
31	4.11788	0.186258	0
32	3.92338	0.190819	0
33	3.78093	0.19438	0
34	3.63382	0.198276	0
35	3.74107	0.195413	0
36	3.65989	0.197568	0
37	3.49216	0.202257	0
38	3.41069	0.204659	0
39	3.35239	0.20643	0
40	3.09752	0.214755	0
41	2.89037	0.222318	0
42	2.69847	0.230087	0
43	2.63906	0.232663	0
44	2.64922	0.232216	0
45	2.65928	0.231776	0
46	2.69847	0.230087	0
47	2.66924	0.231343	0
48	2.70805	0.22968	0
49	2.73625	0.228493	0
50	2.89037	0.222318	0
51	2.92927	0.220837	0
52	3.00993	0.217858	0
53	3.04452	0.216616	0
54	2.99573	0.218373	0
55	2.99573	0.218373	0
56	2.89037	0.222318	0
57	2.86625	0.223251	0
58	2.70805	0.22968	0
59	2.60793	0.234047	0
60	2.71754	0.229278	0
61	2.81625	0.225225	0
62	2.70805	0.22968	0
63	2.71754	0.229278	0
64	2.63906	0.232663	0
65	2.57589	0.235498	0
66	2.57589	0.235498	0
67	2.38481	0.244751	0
68	2.21299	0.254075	0
69	2.30259	0.249082	0
70	2.14838	0.257867	0
71	2.11457	0.25992	0
72	2.25874	0.251488	0
73	2.28818	0.249865	0
74	2.30259	0.249082	0
75	2.49675	0.239201	0
76	2.41081	0.243427	0
77	2.53139	0.237559	0
78	2.60793	0.234047	0
79	2.55389	0.23651	0
80	2.55389	0.23651	0
81	2.46079	0.240943	0
82	2.27357	0.250667	0
83	2.25874	0.251488	0
84	2.19722	0.254984	0
85	1.88267	0.275464	0
86	1.86082	0.277076	0
87	1.86082	0.277076	0
88	1.79176	0.282365	0
89	1.79176	0.282365	0
90	2.16493	0.256879	0
91	2.30259	0.249082	0
92	2.43615	0.242158	0
93	2.61842	0.233578	0
94	2.71754	0.229278	0
95	2.84159	0.224218	0
96	2.81625	0.225225	0
97	3.00286	0.218114	0
98	2.98856	0.218635	0
99	3.03081	0.217106	0
100	3.07135	0.215668	0
101	3.17208	0.212216	0
102	3.27982	0.208702	0
103	3.30112	0.208027	0
104	3.47019	0.202896	0
105	3.72398	0.195861	0
106	3.8889	0.191663	0
107	4.04305	0.187973	0
108	4.14766	0.185588	0
109	4.20895	0.184232	0
110	4.54481	0.177294	0
111	4.68345	0.17465	0
112	4.76217	0.1732	0
113	4.87955	0.171104	0
114	4.92725	0.170274	0
115	5.01538	0.168771	0
116	5.23034	0.165267	0
117	5.21881	0.165449	0
118	5.26491	0.164723	0
119	5.29617	0.164237	0
120	5.36464	0.163185	0
121	5.43247	0.162163	0
122	5.52374	0.160818	0
123	5.58188	0.159978	0
124	5.59736	0.159757	0
125	5.65749	0.158906	0
126	5.69853	0.158332	0
127	5.73979	0.157762	0
128	5.84023	0.1564	0
129	5.87493	0.155937	0
130	5.82135	0.156653	0
131	5.88173	0.155847	0
132	5.91774	0.155372	0
133	6.01476	0.154114	0
134	6.0179	0.154074	0
135	5.95064	0.154942	0
136	6.05912	0.153549	0
137	6.15819	0.152309	0
138	6.16482	0.152227	0
139	6.21232	0.151644	0
140	6.18061	0.152032	0
141	6.19353	0.151873	0
142	6.31329	0.150426	0
143	6.24055	0.1513	0
144	6.17646	0.152083	0
145	6.1909	0.151906	0
146	6.12155	0.152764	0
147	6.08645	0.153204	0
148	6.05478	0.153604	0
149	5.94841	0.154971	0
150	5.86525	0.156066	0
151	5.86606	0.156055	0
152	5.81071	0.156796	0
153	5.75166	0.157599	0
154	5.73241	0.157864	0
155	5.68455	0.158527	0
156	5.5835	0.159955	0
157	5.59205	0.159833	0
158	5.47167	0.161581	0
159	5.41101	0.162484	0
160	5.38318	0.162904	0
161	5.26712	0.164689	0
162	5.2087	0.16561	0
163	5.15659	0.166445	0
164	5.04435	0.168286	0
165	5.00202	0.168997	0
166	4.90527	0.170655	0
167	4.80986	0.17234	0
168	4.77672	0.172936	0
169	4.69528	0.17443	0
170	4.63195	0.175618	0
171	4.64302	0.175409	0
172	4.58788	0.176459	0
173	4.54633	0.177264	0
174	4.46426	0.178886	0
175	4.40846	0.180014	0
176	4.37126	0.180779	0
177	4.34936	0.181233	0
178	4.2174	0.184047	0
179	4.11322	0.186363	0
180	4.04556	0.187915	0
181	3.97567	0.18956	0
182	3.97029	0.189688	0
183	3.95673	0.190013	0
184	3.80029	0.193884	0
185	3.72052	0.195952	0
186	3.74783	0.195236	0
187	3.6817	0.196982	0
188	3.56349	0.200223	0
189	3.44773	0.203556	0
190	3.3673	0.205973	0
191	3.32194	0.207374	0
192	3.17208	0.212216	0
193	2.98856	0.218635	0
194	2.92927	0.220837	0
195	3.00993	0.217858	0
196	2.93688	0.22055	0
197	2.78149	0.226627	0
198	2.71754	0.229278	0
199	2.80765	0.225569	0
200	2.74541	0.228112	0
201	2.70805	0.22968	0
202	2.60793	0.234047	0
203	2.69847	0.230087	0
204	2.82477	0.224885	0
205	2.6888	0.2305	0
206	2.75455	0.227733	0
207	2.81625	0.225225	0
208	2.86625	0.223251	0
209	2.90614	0.221714	0
210	2.97405	0.219168	0
211	2.97405	0.219168	0
212	3.10396	0.214532	0
213	3.07135	0.215668	0
214	3.03081	0.217106	0
215	2.95194	0.219987	0
216	2.89829	0.222014	0
217	2.79031	0.226269	0
218	2.60793	0.234047	0
219	2.71754	0.229278	0
220	2.66924	0.231343	0
221	2.70805	0.22968	0
222	2.81625	0.225225	0
223	2.86625	0.223251	0
224	2.89037	0.222318	0
225	2.95194	0.219987	0
226	2.75455	0.227733	0
227	2.72694	0.228883	0
228	2.6888	0.2305	0
229	2.55389	0.23651	0
230	2.46079	0.240943	0
231	2.38481	0.244751	0
232	2.31678	0.248318	0
233	2.28818	0.249865	0
234	2.22851	0.253188	0
235	2.22851	0.253188	0
236	2.25874	0.251488	0
237	2.19722	0.254984	0
238	2.21299	0.254075	0
239	2.13168	0.258875	0
240	1.94591	0.27095	0
241	1.86082	0.277076	0
242	1.51973	0.306597	0
243	1.45535	0.313305	0
244	2.02433	0.265651	0
245	2.48491	0.239771	0
246	2.5427	0.23703	0
247	2.71754	0.229278	0
248	2.75455	0.227733	0
249	2.80765	0.225569	0
250	2.87435	0.222936	0
251	2.75455	0.227733	0
252	2.49675	0.239201	0
253	2.49675	0.239201	0
254	2.38481	0.244751	0
255	2.43615	0.242158	0
256	2.4485	0.241547	0
257	2.43615	0.242158	0
258	2.31678	0.248318	0
259	2.27357	0.250667	0
260	2.28818	0.249865	0
261	2.30259	0.249082	0
262	2.35811	0.246132	0
263	2.38481	0.244751	0
264	2.30259	0.249082	0
265	2.34459	0.246841	0
266	2.30259	0.249082	0
267	2.37155	0.245434	0

## Sheet: ARE
Column1	Column2	Column3	Column4	Column5	Column6
Input	../Output/Countries/ARE.dat
Flat	no	Result	f(y)~beta0+beta1*y
Regression	asymptotic	c	2	Include	left
Range	0	19
beta0	3.42599	error	0.0819475
beta1	0.142361	error	0.00687416
X	Y	Error	Weight
0	3.44773	0.203556	1				0	3.44773	0.203556	3.42599
1	3.31676	0.207536	1				1	3.31676	0.207536	3.56835
2	3.63382	0.198276	1				2	3.63382	0.198276	3.71071
3	3.80666	0.193722	1				3	3.80666	0.193722	3.85307
4	4.08717	0.186956	1				4	4.08717	0.186956	3.99543
5	4.07754	0.187177	1				5	4.07754	0.187177	4.13779
6	4.08478	0.187011	1				6	4.08478	0.187011	4.28016
7	4.22995	0.183774	1				7	4.22995	0.183774	4.42252
8	4.59223	0.176376	1				8	4.59223	0.176376	4.56488
9	4.80986	0.17234	1				9	4.80986	0.17234	4.70724
10	4.99818	0.169062	1				10	4.99818	0.169062	4.8496
11	5.16804	0.16626	1				11	5.16804	0.16626	4.99196
12	5.3437	0.163505	1				12	5.3437	0.163505	5.13432
13	5.48953	0.161318	1				13	5.48953	0.161318	5.27668
14	5.57432	0.160087	1				14	5.57432	0.160087	5.41904
15	5.63785	0.159182	1				15	5.63785	0.159182	5.5614
16	5.70188	0.158286	1				16	5.70188	0.158286	5.70377
17	5.76429	0.157427	1				17	5.76429	0.157427	5.84613
18	5.80513	0.156872	1				18	5.80513	0.156872	5.98849
19	5.85589	0.15619	1				19	5.85589	0.15619	6.13085
20	5.90731	0.155509	0				20	5.90731	0.155509
21	5.95732	0.154855	0				21	5.95732	0.154855
22	6.00389	0.154253	0				22	6.00389	0.154253
23	6.04094	0.15378	0				23	6.04094	0.15378
24	5.90419	0.15555	0				24	5.90419	0.15555
25	5.93942	0.155088	0				25	5.93942	0.155088
26	5.97126	0.154674	0				26	5.97126	0.154674
27	5.99929	0.154312	0				27	5.99929	0.154312
28	6.0172	0.154083	0				28	6.0172	0.154083
29	6.03719	0.153827	0				29	6.03719	0.153827
30	6.05343	0.153621	0				30	6.05343	0.153621
31	6.21774	0.151577	0
32	6.23385	0.151382	0
33	6.23553	0.151361	0
34	6.2497	0.151189	0
35	6.26774	0.150972	0
36	6.27691	0.150861	0
37	6.28547	0.150759	0
38	6.29315	0.150667	0
39	6.30052	0.150578	0
40	6.32051	0.15034	0
41	6.3	0.150585	0
42	6.29921	0.150594	0
43	6.286	0.150752	0
44	6.28493	0.150765	0
45	6.30157	0.150566	0
46	6.35685	0.14991	0
47	6.38447	0.149585	0
48	6.45901	0.14872	0
49	6.49828	0.148269	0
50	6.53959	0.1478	0
51	6.57885	0.147359	0
52	6.61242	0.146984	0
53	6.60278	0.147091	0
54	6.63181	0.146769	0
55	6.64861	0.146584	0
56	6.68782	0.146153	0
57	6.72211	0.14578	0
58	6.76372	0.145331	0
59	6.76636	0.145303	0
60	6.77455	0.145215	0
61	6.77292	0.145232	0
62	6.75743	0.145399	0
63	6.74775	0.145503	0
64	6.69067	0.146122	0
65	6.62539	0.14684	0
66	6.60896	0.147023	0
67	6.58558	0.147283	0
68	6.54801	0.147705	0
69	6.50983	0.148138	0
70	6.44118	0.148925	0
71	6.46281	0.148676	0
72	6.45968	0.148712	0
73	6.43706	0.148973	0
74	6.409	0.149299	0
75	6.39311	0.149484	0
76	6.37673	0.149676	0
77	6.38447	0.149585	0
78	6.34011	0.150108	0
79	6.31173	0.150445	0
80	6.27611	0.150871	0
81	6.2106	0.151665	0
82	6.14357	0.15249	0
83	6.08613	0.153208	0
84	6.01162	0.154154	0
85	5.97925	0.154571	0
86	5.93489	0.155147	0
87	5.89519	0.155669	0
88	5.92921	0.155222	0
89	5.9428	0.155044	0
90	5.95547	0.154879	0
91	5.98033	0.154557	0
92	5.99538	0.154363	0
93	6.00141	0.154285	0
94	6.00106	0.15429	0
95	6.01685	0.154087	0
96	6.04128	0.153775	0
97	6.05511	0.1536	0
98	6.03889	0.153806	0
99	6.02862	0.153937	0
100	6.11494	0.152846	0
101	6.21375	0.151626	0
102	6.28173	0.150803	0
103	6.30262	0.150553	0
104	6.33125	0.150213	0
105	6.34212	0.150084	0
106	6.37478	0.149699	0
107	6.32513	0.150285	0
108	6.24167	0.151287	0
109	6.16	0.152286	0
110	6.10288	0.152997	0
111	6.05142	0.153646	0
112	5.99254	0.154399	0
113	5.89872	0.155622	0
114	5.82558	0.156596	0
115	5.77632	0.157263	0
116	5.68843	0.158473	0
117	5.65249	0.158976	0
118	5.61677	0.159481	0
119	5.59631	0.159772	0
120	5.58188	0.159978	0
121	5.56452	0.160228	0
122	5.57757	0.16004	0
123	5.65048	0.159004	0
124	5.64696	0.159054	0
125	5.67871	0.158608	0
126	5.74438	0.157699	0
127	5.76609	0.157402	0
128	5.77588	0.157269	0
129	5.74939	0.15763	0
130	5.69709	0.158352	0
131	5.64797	0.159039	0
132	5.55296	0.160394	0
133	5.48361	0.161405	0
134	5.4455	0.161969	0
135	5.40332	0.1626	0
136	5.39363	0.162746	0
137	5.3845	0.162884	0
138	5.39428	0.162736	0
139	5.44056	0.162043	0
140	5.43559	0.162117	0
141	5.45898	0.161769	0
142	5.52602	0.160785	0
143	5.55074	0.160426	0
144	5.54238	0.160547	0
145	5.56998	0.160149	0
146	5.62453	0.15937	0
147	5.7175	0.158069	0
148	5.80039	0.156936	0
149	5.82642	0.156585	0
150	5.88412	0.155815	0
151	5.95324	0.154908	0
152	5.97017	0.154688	0
153	5.96064	0.154812	0
154	5.94729	0.154986	0
155	5.95843	0.154841	0
156	5.95805	0.154846	0
157	5.95916	0.154831	0
158	5.94878	0.154966	0
159	6.04331	0.153749	0
160	6.11998	0.152783	0
161	6.22031	0.151546	0
162	6.25465	0.15113	0
163	6.31381	0.15042	0
164	6.38326	0.149599	0
165	6.41906	0.149182	0
166	6.40239	0.149376	0
167	6.41883	0.149184	0
168	6.45273	0.148792	0
169	6.52146	0.148006	0
170	6.58637	0.147275	0
171	6.64416	0.146633	0
172	6.6675	0.146376	0
173	6.72177	0.145784	0
174	6.72692	0.145728	0
175	6.71988	0.145804	0
176	6.69474	0.146078	0
177	6.683	0.146206	0
178	6.64695	0.146602	0
179	6.65323	0.146533	0
180	6.63501	0.146734	0
181	6.66786	0.146372	0
182	6.7107	0.145904	0
183	6.74759	0.145505	0
184	6.77128	0.14525	0
185	6.81439	0.14479	0
186	6.84177	0.1445	0
187	6.83365	0.144585	0
188	6.85541	0.144356	0
189	6.85797	0.144329	0
190	6.88112	0.144086	0
191	6.90618	0.143824	0
192	6.92784	0.143599	0
193	6.95409	0.143328	0
194	6.99498	0.142908	0
195	7.00358	0.142821	0
196	6.99655	0.142892	0
197	6.98749	0.142985	0
198	6.97341	0.143129	0
199	6.95967	0.14327	0
200	6.9671	0.143194	0
201	6.98472	0.143013	0
202	7.01776	0.142676	0
203	7.06586	0.14219	0
204	7.10285	0.141819	0
205	7.1417	0.141433	0
206	7.1869	0.140987	0
207	7.19968	0.140862	0
208	7.18365	0.141019	0
209	7.15751	0.141276	0
210	7.16935	0.14116	0
211	7.18895	0.140967	0
212	7.2051	0.140809	0
213	7.2001	0.140858	0
214	7.21535	0.140709	0
215	7.23572	0.140511	0
216	7.26743	0.140204	0
217	7.25357	0.140338	0
218	7.22631	0.140602	0
219	7.18485	0.141008	0
220	7.14396	0.14141	0
221	7.13478	0.141501	0
222	7.14868	0.141364	0
223	7.10485	0.141799	0
224	7.07641	0.142084	0
225	7.07363	0.142112	0
226	7.08805	0.141967	0
227	7.09043	0.141943	0
228	7.07036	0.142145	0
229	7.05962	0.142253	0
230	7.07036	0.142145	0
231	7.07677	0.14208	0
232	7.05814	0.142268	0
233	7.05	0.14235	0
234	7.05408	0.142308	0
235	7.06622	0.142186	0
236	7.07388	0.142109	0
237	7.09293	0.141918	0
238	7.10215	0.141826	0
239	7.10414	0.141806	0
240	7.10918	0.141756	0
241	7.1194	0.141654	0
242	7.11883	0.14166	0
243	7.10203	0.141827	0
244	7.10848	0.141763	0
245	7.10906	0.141757	0
246	7.12666	0.141582	0
247	7.12827	0.141566	0
248	7.12712	0.141577	0
249	7.13238	0.141525	0
250	7.13717	0.141478	0
251	7.13478	0.141501	0
252	7.13341	0.141515	0
253	7.13478	0.141501	0
254	7.13796	0.14147	0
255	7.13364	0.141513	0
256	7.12241	0.141624	0
257	7.12712	0.141577	0

## Sheet: regression of top 5
code	Region Name	Sub-region Name	country	slope	error	number_of_points	start_date	end_date	r0	r0_error	pf_eigenvalue	pf_eigenvalue [0]	pf_eigenvalue [0, 1]	pf_eigenvalue [0, 1, 2]	pf_eigenvalue [0, 1, 2, 3]	pf_eigenvalue [0, 1, 2, 3, 4]	pf_eigenvalue [0, 1, 2, 3, 4, 5]	pf_eigenvalue [0, 1, 2, 3, 4, 5, 6]	pf_eigenvalue [0, 1, 2, 3, 4, 5, 6, 7]
MAR	Africa	Northern Africa	Morocco	0.0524797	0.00342505	32	43916	43947	1.32233	0.0237733	18.3856	18.1837	17.4678	15.8653	9.8879	7.65836	5.92906	4.51358	3.29638
EGY	Africa	Northern Africa	Egypt	0.0451354	0.000687704	88	43912	43999	1.27222	0.00461053	22.1098	21.9294	21.4416	19.9262	9.87108	6.83491	5.22368	4.14406	2.98306
DZA	Africa	Northern Africa	Algeria	0.0199439	0.00113185	66	43915	43980	1.11306	0.00672948	20.0421	19.8623	19.4133	18.0019	10.3666	7.07576	4.92879	3.57009	2.36333
TUN	Africa	Northern Africa	Tunisia	-0.0454101	0.00295534	42	43918	43959	0.780113	0.0127673	18.9758	18.8403	18.4159	17.2226	10.3443	7.66712	5.7449	4.33073	3.08212
GHA	Africa	Sub-Saharan Africa	Ghana	0.0700693	0.00319379	33	43933	43965	1.44961	0.0240764	20.9727	20.141	18.1881	15.6529	11.5655	9.8076	8.05418	6.45955	4.81656

## Sheet: R0 vs gen time (mu, kappa)
mu	5.19	5.19	5.19	5.4	5.4	5.4	5.61	5.61	5.61
kappa	0.083531	0.10983	0.232031	0.0771605	0.101454	0.214335	0.0714919	0.0940007	0.198589
std	1.5	1.72	2.5	1.5	1.72	2.5	1.5	1.72	2.5
r	R0
0.33	4.95673	4.80346	4.22959	5.31044	5.14502	4.52348	5.68952	5.51108	4.8384		0.105832	-0.177925
0.3	4.32215	4.20947	3.77809	4.60189	4.4811	4.01709	4.89984	4.77041	4.27164		0.0934459	-0.156884
0.27	3.76284	3.68177	3.36455	3.98151	3.8952	3.55635	4.21296	4.1211	3.75937		0.0815777	-0.136231
0.24	3.27059	3.21379	2.98669	3.43913	3.37907	3.13818	3.6164	3.55291	3.29754		0.0702364	-0.116119
0.21	2.83802	2.79952	2.64231	2.96567	2.92524	2.75966	3.09909	3.05664	2.88234		0.0594323	-0.0967204
0.18	2.45848	2.43347	2.32926	2.55302	2.52694	2.41797	2.65121	2.62402	2.51012		0.0491768	-0.0782269
0.15	2.12598	2.11066	2.04552	2.19393	2.17806	2.11044	2.26406	2.24763	2.17745		0.0394826	-0.0608538
0.12	1.83518	1.82654	1.7891	1.88197	1.87309	1.83451	1.92996	1.92083	1.88108		0.0303642	-0.0448391
0.09	1.58125	1.57698	1.55812	1.61141	1.60705	1.58775	1.64214	1.63769	1.61795		0.0218377	-0.0304456
0.06	1.35991	1.35824	1.35076	1.37715	1.37546	1.36786	1.39461	1.3929	1.38518		0.0139211	-0.0179614
0.03	1.1673	1.16694	1.16527	1.17468	1.17431	1.17263	1.1821	1.18173	1.18004		0.00663433	-0.00769988
0	1	1	1	1	1	1	1	1	1		0	0
